# Supplementary material
Source: PubMed Central journal article supplement (PMC10308299)
Supplement: jamacardiol-e231749-s001.pdf [file jamacardiol-e231749-s001.pdf]

---

|   |                                                 |           |
|---|-------------------------------------------------|-----------|
| 1 | <b>Original Protocol of STABLE-SR-III .....</b> | <b>2</b>  |
| 2 | <b>Protocol amendment .....</b>                 | <b>30</b> |
| 3 |                                                 |           |
| 4 |                                                 |           |

5  
6  
7  
8  
9  
10  
11  
12  
13  
14  
15

## Supplement Protocol

### **Additional low-voltage area ablation in older patients with paroxysmal atrial fibrillation: a randomized controlled trial**

This supplement contains the following items:

1. Original protocol.
2. Protocol amendment

16 **Additional low-voltage area ablation in older patients with paroxysmal atrial**  
17 **fibrillation: a randomized controlled trial**

18  
19

20 **PRINCIPAL INVESTIGATOR**

21  
22 Name Minglong Chen  
23 Hospital The First Affiliated Hospital of Nanjing Medical University  
24 Address 300 Guangzhou Road  
25 City Nanjing  
26 Country P.R. China  
27 Telephone +86 13809000791  
28 E-mail chenminglong@njmu.edu.cn  
29  
30

|    |                                                |    |
|----|------------------------------------------------|----|
| 31 | <b>CONTENTS</b>                                |    |
| 32 |                                                |    |
| 33 | 1 BACKGROUND .....                             | 5  |
| 34 | 2 OBJECTIVES.....                              | 8  |
| 35 | 3 ENDPOINTS .....                              | 8  |
| 36 | 4 PATIENT SELECTION CRITERIA .....             | 9  |
| 37 | 5 INVESTIGATION DESIGN .....                   | 9  |
| 38 | 6 PRODUCT.....                                 | 10 |
| 39 | 7 SCIENTIFIC SOUNDNESS .....                   | 11 |
| 40 | 8 PROTOCOL DESCRIPTION .....                   | 13 |
| 41 | 9 RISK DESCRIPTION AND MINIMIZATION .....      | 22 |
| 42 | 10 INVESTIGATION ORGANIZATION.....             | 22 |
| 43 | 11 APPENDIX A: ABBREVIATIONS .....             | 25 |
| 44 | 12 APPENDIX B: DATA COLLECTION .....           | 26 |
| 45 | 13 APPENDIX C: RANDOMISATION INSTRUCTIONS..... | 27 |
| 46 | 14 APPENDIX D: REFERENCES.....                 | 28 |
| 47 |                                                |    |
| 48 |                                                |    |

## 1 BACKGROUND

### Current Status of Catheter Ablation of Paroxysmal Atrial Fibrillation

Atrial fibrillation (AF) is the most common cardiac rhythm disorder, which affects patients' morbidity and mortality. In 1998, Haissaguerre reported that the pulmonary veins are an important source of ectopic beats, initiating frequent paroxysms of paroxysmal atrial fibrillation (PAF).<sup>1</sup> These foci respond well to the treatment with radiofrequency ablation. Pappone applied circumferential pulmonary vein ablation under the guidance of the electroanatomical mapping system to treat paroxysmal and chronic atrial fibrillation.<sup>2</sup> Then, doctors in Hamburg further emphasized the isolation endpoint of this circumferential ablation confirmed by the double-lasso technique.<sup>3</sup> Currently, the most commonly employed strategy for trigger ablation is the isolation of the pulmonary venous antra from the rest of the left atrium (LA), which has become the cornerstone of all AF ablation.<sup>4</sup>

### Pulmonary Vein Isolation alone is not enough

When circumferential wide-antral pulmonary vein isolation (CPVI) was undertaken, the short-term of single-procedure success rate could reach 90%.<sup>3</sup> However, the long-term outcome was quite different. Data from the Hamburg center reported, sinus rhythm (SR) was present in only 46.6% of patients after the single-procedure during a long-term follow-up of 5 years.<sup>5</sup> Recently, CPVI was achieved by using the contact-force sensing catheter and algorithm-based lesion quality control, the single-procedure success rate for PAF was as high as 72.5-75.9% over 1-year follow-up.<sup>6-7</sup> However, the overall success rate for PAF is still unsatisfactory, especially in senior patients, with larger LA size or more comorbidities.<sup>8-9</sup>

### Additional Linear Ablation and CFE Ablation without Additional Benefit

In our previous study, we randomized 118 patients with drug-refractory PAF to receive CPVI ablation (n = 60) or complex fragmental electrograms (CFE) ablation (n = 58). Patients who received CFE ablation alone had significantly lower overall success rate (38% vs 77%, P = 0.002) and higher recurrence rate of atrial tachycardia (AT) (34.5% vs 11.9%, P = 0.004) compared with patients who received CPVI alone. Further analysis demonstrated that CPVI plus CFE ablation did not improve the overall success rate (CPVI vs CPVI plus CFE, 77% vs 69%).<sup>10</sup> In the STAR-AF II trial, 589 patients with persistent atrial fibrillation (PeAF) were enrolled in a 1:4:4 ratio to ablation with pulmonary-vein isolation alone (67 patients), pulmonary-vein isolation plus ablation of electrograms showing complex fractionated activity (263 patients), or pulmonary-vein isolation plus additional linear ablation across the left atrial roof and mitral valve isthmus (259 patients). It demonstrated no reduction in the rate of recurrent AF when either linear ablation or ablation of CFEs was performed in addition to pulmonary-vein isolation in PeAF patients.<sup>11</sup> Similarly, our single-center study found that even with a combination of all these strategies (additional linear ablation or ablation of CFEs), the 15-month success rate was only 50%.<sup>12</sup> It appears that additional linear ablation and CFEs ablation do not dramatically improve the overall success of PeAF ablation. This unsatisfactory result might be due to the high occurrence of post-procedural AT and suggested that extensive CFEs and/or line ablation might be proarrhythmic and more selective areas might be needed to characterize an individualized arrhythmogenic substrate.

### Scar Homogenization as the Ablation Strategy for AF

Since the atrial fibrotic areas correlate strongly with AF, catheter ablation targeting these areas as substrate modification beyond CPVI is a new strategy. In the study of Rolf et al, 178 patients with paroxysmal or persistent AF were included. The confined lower voltage area (LVA) was targeted for regional ablation, which aimed to homogenize the diseased LA tissue by radiofrequency ablation during SR.<sup>13</sup> The end point for areal ablation was reached with a significant reduction in local electrograms, defragmentation, and loss of capture while

101 stimulating the ablation catheter with high output (10 mA; 2 ms) during SR. Strategic linear  
102 lesions were performed whenever ablative substrate homogenization could not be completed  
103 because of potential collateral damage (e.g, septal near the AV-node or posterior close to the  
104 esophagus) or when extensive regional ablation might have created critical isthmus sites for  
105 potential macro-reentrant tachycardias (e.g, near the roof or anterior LA to prevent  
106 roof-dependent or peri-mitral AT). These strategic linear lesions either connected  
107 non-conducting tissues with other anatomic electrical barrier structures traversing target LVA or  
108 encircled large LVA to electrically isolate the diseased tissue from the rest of the healthy atrium.  
109 The end-point for strategic lesion creation was reached with the confirmation of a complete  
110 block (e.g, peri-mitral conduction) as indicated by (1) reduction of local electrogram amplitude,  
111 (2) loss of local capture, (3) confirmation of double potentials on the line and analysis of  
112 activation sequence, while stimulating near the linear lesion line. After CPVI with or without  
113 substrate modification, burst pacing (10V; 2ms) from the proximal coronary sinus was conducted  
114 (10-s periods, decreasing cycle lengths from 300ms until refractoriness in 20-ms steps).  
115 Inducible regular AT were targeted for radiofrequency ablation with AT termination and  
116 non-inducibility as the clinical end-point. The success rate at 12 months was 70% in patients  
117 with LVA, and 62% in patients without LVA. Success rate did not differ significantly in  
118 paroxysmal patients versus patients with PeAF (69% vs 61%;  $P = 0.28$ ). In the same way,  
119 Kottkamp H et al. applied box isolation of fibrotic areas in both paroxysmal and  
120 non-paroxysmal AF patients and achieved favorable results.<sup>14-15</sup>

121

122 Voltage-guided ablation of the posterior wall beyond CPVI may also improve arrhythmia-free  
123 survival.<sup>16</sup> After CPVI was achieved, posterior wall voltage mapping was performed using a  
124 3-D electro-anatomical mapping system during SR. The presence of a scar was defined as a  
125 region that reproducibly demonstrated an area of  $> 0.25 \text{ cm}^2$  on the posterior wall with a voltage  
126 less than 0.5mV. Posterior wall ablation, if the low voltage was found, was preferably performed  
127 using a posterior roof line and a floor line completing a posterior wall “box”. Importantly, the  
128 borders of the box were intended to encompass the area of low voltage. The low voltage to be  
129 targeted without completion of the “box” was allowed if clinically indicated, such as esophageal  
130 temperature concerns. Voltage-guided ablation increased 1-year AF/AT free survival in patients  
131 compared to standard ablation (80% vs 57%;  $P = 0.005$ ). However, another study compared the  
132 long-term outcome in patients with PAF and severe LA scarring identified by 3-D mapping, in  
133 which CPVI only, CPVI plus the scar homogenization, or CPVI plus a strategy of the non-PV  
134 triggers were applied.<sup>17</sup> In this selective population, the long-term outcome of CPVI plus scar  
135 homogenization was only slightly improved.

136 We noticed the correlation between AF and atrial fibrosis and hypothesized that the LA fibrotic  
137 areas might be the AF-maintaining substrate. Based on this proposition, we performed LA  
138 high-density substrate mapping during SR in different AF populations (paroxysmal,  
139 non-paroxysmal, and longstanding persistent AF), with 20 normal subjects as controls. Our study  
140 showed that with AF progression, the average voltage of LA decreased and the area of the low  
141 voltage zone increased; the activation time of the entire LA got longer, while more complex  
142 electrograms during SR were found in LA. Importantly, we defined the LVA (voltage range:  
143 0.1-0.4 mV) and the transitional zone (TZ, voltage range: 0.4-1.3 mV) in which 95% of sampling  
144 points were located during SR.<sup>18</sup> After this study, a novel ablation strategy was developed  
145 (CPVI plus, STABLE-SR), which modified the LA substrate during SR. Our sequential ablation  
146 protocol includes 5 steps. First, CPVI should be completed followed by cavotricuspid isthmus  
147 ablation. Then, if AF is maintained, direct current cardioversion was performed. High-density  
148 mapping of LA substrate would be done during SR to identify the LVA and TZ. Homogenization  
149 of the low voltage zones and elimination of the complex electrograms from the TZs would be  
150 performed. If possible, linear ablation would be designed according to the mapping results.  
151 Finally, bidirectional conduction block should be demonstrated for all the linear lesions, and all  
152 the PVs would be double checked for isolation.<sup>19</sup> The most important revolution of our novel  
153 approach was the individualized LVA ablation based on electrophysiological mapping results to

154 avoid empirical linear ablation and subjective CFE ablation.

155

### 156 **STABLE-SR Pilot Study**

157 In our single-center pilot study regarding this new ablation strategy for non-paroxysmal AF  
158 patients, the promising results were shown. A total of 78 matched patients who had a traditional  
159 stepwise ablation strategy were used as the control group. During a follow-up period of >30  
160 months, the Kaplan-Meier estimated probability to maintain SR was 69.8% vs 51.3%. After a  
161 single procedure, 3.5% developed post procedural AT in the study group compared with 30% in  
162 the control group (P = 0.0003).<sup>19</sup> This strategy proposed a more comprehensive substrate  
163 modification approach not only targeting the profound LVA but also addressing the TZs. It is  
164 analogous to what has been used in conventional pathologic ventricular tachycardia ablation and  
165 is supposed to be the combination of both curative (AF) and preventative (AT) strategies. The  
166 other reproducible study was from Dr. Yamaguchi's work.<sup>20</sup>

167

### 168 **A Randomised Controlled Multicenter Trial (STABLE-SR)**

169 A large-scale randomized controlled clinical trial was designed and conducted by our center to  
170 prove the effectiveness and the reproducibility of this new approach compared to the STEPWISE  
171 strategy. In this multicenter, randomized clinical trial, 229 symptomatic non-paroxysmal AF  
172 patients were 1:1 randomized to the STABLE-SR group (n=114) or the conventional STEPWISE  
173 (n=115) group. At 18 months, 74.0% of the patients in the STABLE-SR group and 71.5% in the  
174 STEPWISE group (HR: 0.78, 95% CI: 0.47-1.29, P = 0.325) achieved success according to  
175 intention-to-treat analysis. However, less procedure time (186.8±52.7 min vs 210.5±48.0 min, P  
176 < 0.001), reduced post-CPVI fluoroscopic time (11.0±7.8 min vs 13.7±8.9 min, P = 0.006), and  
177 shorter energy delivery time (60.1±25.1min vs 75.0±24.3 min, P < 0.001) were observed in the  
178 STABLE-SR group compared to the STEPWISE group. Over 50% of non-paroxysmal AF  
179 patients do not need further ablation beyond CPVI and therefore can avoid excessive ablation.<sup>21</sup>

180

### 181 **Why We Start STABLE-SR III Trial?**

182 Currently, effective ablation strategies including CPVI at the PV antrum level, drug provocation,  
183 targeting non-PV triggers, and LVA modification have been performed in PAF patients to further  
184 improve the success rate.<sup>6-7,13,22</sup> Among these, the benefit of durable CPVI and non-PV triggers  
185 ablation has been reported and sufficiently proved. However, the long-term outcome of CPVI is  
186 worse in older PAF individuals than that in younger patients;<sup>23-25</sup> moreover, data on LVA  
187 ablation in PAF patients is limited and which population benefits the most remains unknown.  
188 This poor result might be attributed to the development of different extents of atrial fibrosis  
189 which has been supported by various studies of histopathology,<sup>26-27</sup> magnetic resonance imaging,  
190<sup>28</sup> and voltage map.<sup>29</sup> It has been demonstrated that left atrial fibrosis increased with age in both  
191 men and women with AF. Our previous studies demonstrated that atrial fibrosis was the  
192 proarrhythmic substrate which could be translated into electric signal abnormalities and depicted  
193 on 3-D voltage map,<sup>12,19,21</sup> and targeting LVA beyond CPVI was a simplified and personalised  
194 adjunctive strategy for persistent AF.<sup>19,21</sup> We hypothesize that senior PAF patients who might  
195 have more LA substrate could also benefit from LVA ablation beyond CPVI for further  
196 improving the single ablation success rate. Moreover, no study has investigated the prevalence of  
197 LVA in senior PAF patients and no randomized clinical trial has been conducted to prove the  
198 efficacy and safety of LVA ablation in older patients with PAF. Therefore, we design this  
199 multicenter randomized single-blind trial to compare the efficacy of CPVI plus LVA ablation vs  
200 CPVI alone in older PAF individuals.

## 201 **2 OBJECTIVES**

202

203

204

### 205 **2.1 PRIMARY OBJECTIVES**

206 The primary objective of this investigation is to compare the efficacy of two different  
207 AF ablation strategies in older patients with PAF.

208 The definition of the groups:

209 *Study Group* (CPVI plus group): CPVI plus LVA ablation in the left atrium during SR;

210 *Control Group* (CPVI alone group): only CPVI.

211

### 212 **2.2 SECONDARY OBJECTIVES**

213

214

The secondary objectives of this investigation are to evaluate and compare:

215

2.2.1 The safety of:

216

“CPVI plus” versus “CPVI alone”

217

2.2.2 The total procedural time of:

218

“CPVI plus” versus “CPVI alone”

219

2.2.3 The total fluoroscopic time of:

220

“CPVI plus” versus “CPVI alone”

221

2.2.4 The total radiofrequency delivery time of:

222

“CPVI plus” versus “CPVI alone”

223

224

### 225 **2.3 SUBGROUPS OBJECTIVES**

226

2.3.1 According to the presence or absence of LVA and different ablation strategies, all enrolled  
227 patients will be divided into 3 subgroups to evaluate the primary and secondary end-points:

228

The definition of the subgroup:

229

Subgroup A: patients with LVA who received “CPVI plus”

230

Subgroup B: patients with LVA who received “CPVI alone”

231

Subgroup C: all the enrolled patients without LVA of both groups

232

2.3.2 Six prespecified subgroups were used for pairwise subgroup analyses: age, sex, body mass  
233 index (BMI); AF history; left atrial diameter (LAD); CHA<sub>2</sub>DS<sub>2</sub>-VASc.

234

235

236

## 237 **3 ENDPOINTS**

238

239

### 240 **3.1 PRIMARY ENDPOINT**

241

242 The primary endpoint of the study is freedom from atrial tachyarrhythmia (ATA) lasting  
243 longer than 30 seconds occurring after a single-ablation procedure. ATA occurrence in the  
244 first 3 months after the index ablation (post-blanking period) is not counted. The episodes  
245 of ATA are confirmed through blinded review by two senior electrophysiologists. In case  
246 of disagreement, a third senior electrophysiologist will be invited for further consultation.

247

### 248 **3.2 SECONDARY ENDPOINT**

249

The secondary endpoints of this investigation between two groups are:

250

3.2.1 Incidence of peri-procedural complications, including stroke, PV stenosis, cardiac  
251 perforation, esophageal injury, and death;

252

3.2.2 Total procedure time;



- 252 3.2.3 Total fluoroscopic time;  
 253 3.2.4 Total radiofrequency delivery time.

254  
 255

## 256 **4 PATIENT SELECTION CRITERIA**

257  
 258

### 259 **4.1 PATIENT ENROLMENT**

260

261 A patient who meets all the inclusion criteria and does not meet any of the exclusion  
 262 criteria is eligible to participate in the investigation. A patient is enrolled in the  
 263 investigation only when she/he has provided written informed consent. Once enrolled,  
 264 the patient is expected to comply with the scheduled visits and required activities  
 according to the protocol.

265

266

### 267 **4.2 INCLUSION CRITERIA**

268

269

270

271

272

273

274

275

276

277

278

279

280

281

282

283

284

285

286

287

288

289

290

291

292

293

294

295

296

297

298

299

300

301

302

303

### 272 **4.3 EXCLUSION CRITERIA**

274 4.3.1 Patients with previous radiofrequency ablation;

275 4.3.2 Patients with platelet count less than  $80 \times 10^9/L$ , or with contraindications to systemic  
 276 anticoagulation with heparin or coumadin or a direct thrombin inhibitor;

277 4.3.3 Patients with LA size  $\geq 55$  mm (2D echocardiography, parasternal long-axis view);

278 4.3.4 Patients with thromboemboli in LA (transesophageal echocardiogram or computed  
 279 tomographic angiography);

280 4.3.5 Patients with severe structural cardiac disease (medium or severe mitral regurgitation,  
 281 dilated cardiomyopathy, hypertrophic cardiomyopathy, or other severe valvular heart  
 282 diseases);

283 4.3.6 Patients with abnormal thyroid function;

284 4.3.7 Patients with severe liver or renal dysfunction (AST or ALT  $\geq 3$ -fold of upper limit value;  
 285 the Scr  $> 3.5$  mg/dl or Ccr  $< 30$  ml/min);

286 4.3.8 Previous cardiac surgery history in last 3 months;

287 4.3.9 Patients with life expectancy  $< 12$  months.

## 289 **5 INVESTIGATION DESIGN**

290

291

292

293

294

295

296

297

298

299

300

301

302

303

### 291 **5.1 TYPE**

293 This investigation is a randomized, prospective, parallel, single-blind multicenter design.

### 295 **5.2 DURATION**

297 5.2.1 The first enrollment will be in Q1 of April 1, 2018.

298 5.2.2 The enrolment period will last approximately 24 months.

299 5.2.3 Patients will participate in this investigation for at least 12 months from enrolment to the  
 300 last follow-up.

301 5.2.4 Patients may withdraw from the investigation at any time, for any reason. In this case, the  
 302 procedures for reporting should be followed as mentioned in section 8.4 Early Conclusion  
 303 to Patient Participation.

304  
305  
306  
307  
308  
309  
310  
311  
312  
313  
314  
315  
316  
317  
318

### 5.3 ENROLMENT TARGET

The enrolment target for this investigation is 434 patients. For more information, refer to section 7.1 Sample Size Justification.

### 5.4 RANDOMISATION

- 5.4.1 Simple computerized randomization is used.  
5.4.2 Patients are randomized in a 1:1 fashion into the investigation arm or the control arm.  
5.4.3 Because of the nature of the ablation procedures, physicians cannot be blinded to the randomization. Patients will be blinded to their ablation strategy (single-blind design).

### 5.5 DESIGN

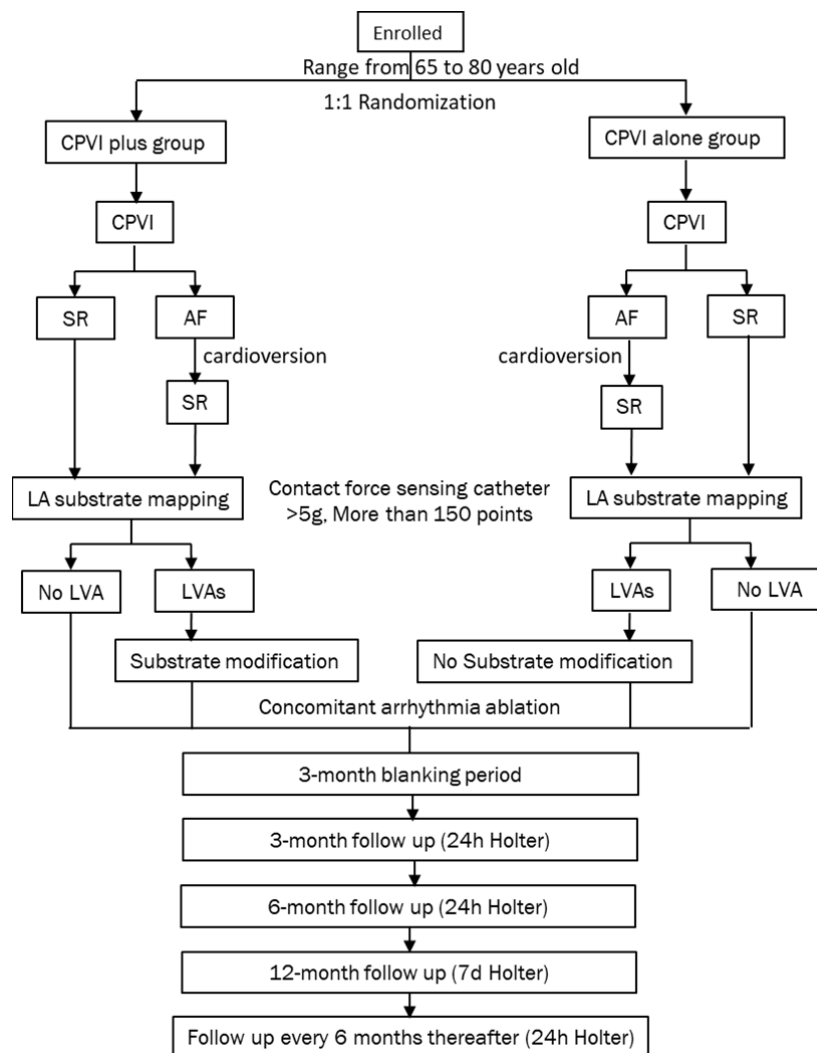

319  
320  
321  
322  
323  
324

CPVI plus group: CPVI plus LVA ablation in the LA during SR;  
CPVI alone group: only CPVI.

AF/AT/AFL recurrence during the blanking period will not be considered. If AF/AT/AFL recurrence is detected after the blanking period, the patient would be advised to receive a redo procedure according to the operator.

### 325 6 PRODUCT

326

327

**6.1 MAPPING PLATFORM**CARTO<sup>®</sup> 3 Mapping system.

328

329

**6.2 OTHER PRODUCTS**

Thermocool smart-touch contact force sensing ablation catheter

330

331

Vistag<sup>™</sup>, ablation index, CARTO<sup>®</sup> 3

332

333

**7 SCIENTIFIC SOUNDNESS**

334

335

**7.1 SAMPLE SIZE JUSTIFICATION**

336

337

7.1.1 The sample size calculation is based on the hypothesis and study design. It is expected that the survival proportion (freedom from AF and/or AT) in the “CPVI plus” group is 85%, while the survival proportion (freedom from AF and/or AT) in the CPVI group is 75% at 12 months follow-up. To test whether the “CPVI plus” strategy is superior to the CPVI strategy using the log-rank test, a total of 369 patients is needed to maintain an overall power of 90% at a significance level of 5%; with a randomization ratio of 1:1, 185 patients are needed in each group. The sample size was calculated based on the Log-rank statistic test (enrolment duration of 24 months, follow-up duration of at least 12 months, PASS 13).

338

339

340

341

342

343

344

345

7.1.2 Expecting a dropout rate of 15%, a total of 434 patients (217 in each group) will be recruited.

346

347

348

**7.2 HYPOTHESIS**

349

The “CPVI plus” approach will be superior to the “CPVI alone” approach in terms of freedom from AF and/or AT at 12 months after one ablation procedure.

350

351

*H0: S “CPVI plus” ≤ S “CPVI alone” vs H1: S “CPVI plus” > S “CPVI alone”*

352

353

354

**7.3 PRIMARY ENDPOINT ANALYSIS**

355

356

7.3.1 The primary endpoint analyses will be based on the modified intention-to-treat (mITT) principle comparing treatment randomized, and all protocol deviators will be included. mITT is defined as patient undergoing ablation and completing at least one follow-up visit. In addition, per-protocol (PPS) analyses will compare patient data based on the actual treatment received and will exclude protocol deviators.

357

358

359

360

361

7.3.2 The primary outcome will be analyzed to compare the two groups using survival analyses, in which Kaplan-Meier curves are generated, and log-rank tests are performed. Cox proportion hazards regression is used to estimate HR and 95% confidence intervals (CI). Proportional hazard assumption will be tested by including both the interaction term “treatment\*time” and the binary treatment variable into one model. If the proportional hazard assumption is violated, milestone analysis will be used to estimate the treatment effect at the time of 24 months and 36 months. The interactions by age, sex, BMI, AF history, left atrial diameter, and CHA2DS2-VASc score were examined.

362

363

364

365

366

367

368

369

7.3.3 Any baseline demographic factor found to be significantly different between the treatments will be assessed for its impact on the primary endpoint analysis. For this purpose, a Cox regression model with treatment and above baseline factor will be used.

370

371

372

373

**7.4 SECONDARY ENDPOINT ANALYSIS**

374

375

7.4.1 The continuous variables will be summarized using descriptive statistics (mean ± standard deviation) if data are normal distribution or median (IQR) if data are non-normal distribution). Comparisons between the randomization groups will be performed using ANOVA; an equivalent nonparametric method, the Kruskal-Wallis test, will be used in case the assumption for ANOVA is violated. Normality of data will be assessed with the aid of box plots, normal quartile plots, and normality tests. The results will be expressed

376

377

378

379

380

381 in terms of p-values.

382

383

384

385

386

387

388

7.4.2 All categorical data will be presented using frequencies and percentages, and the comparisons between the randomization groups will be performed using chi-square tests if each cell in the contingency table has an expected frequency of five or more. If this is violated, Fisher's exact test will be used instead. The results will be expressed in terms of p-values.

389 **8 PROTOCOL DESCRIPTION**

390

391

392

393

**8.1 PROCEDURES OVERVIEW****Table 1 Procedure Overview**

|                                     | <b>When</b>                                         | <b>Window</b>  | <b>Activities</b>                                                                                                                                                                                                                                                                                                                                                                                                 |
|-------------------------------------|-----------------------------------------------------|----------------|-------------------------------------------------------------------------------------------------------------------------------------------------------------------------------------------------------------------------------------------------------------------------------------------------------------------------------------------------------------------------------------------------------------------|
| Enrolment                           | Within 14 days before or during Baseline Visit      | Not Applicable | <ul style="list-style-type: none"> <li>• Patient Eligibility</li> <li>• Patient Informed Consent</li> </ul>                                                                                                                                                                                                                                                                                                       |
| Baseline Visit                      | Within 30 days before Ablation Procedure            | Not Applicable | <ul style="list-style-type: none"> <li>• Patient Demographics &amp; Physical Examination</li> <li>• Patient Cardiovascular History</li> <li>• Patient Current Cardiac Medications</li> <li>• Patient Medical History</li> <li>• Patient AF History</li> <li>• 12-Lead ECG</li> <li>• UCG (Size of LA, LVEDD, LVEF)</li> <li>• INR (2-3), if warfarin was prescribed</li> <li>• Exclusion of LAA emboli</li> </ul> |
| Ablation Procedure                  | Within 30 days after Baseline Visit                 | Not Applicable | <ul style="list-style-type: none"> <li>• Randomisation</li> <li>• Ablation Procedure Data Collection</li> <li>• Adverse Events (*)</li> </ul>                                                                                                                                                                                                                                                                     |
| 1 <sup>st</sup> protocol follow-up  | 91 days after first Ablation Procedure (3 Months)   | ± 14 days      | <ul style="list-style-type: none"> <li>• AF/AT Recurrence Assessment</li> <li>• Patient Current Cardiac Medications</li> <li>• 24-Hour Holter</li> <li>• Adverse Events (*)</li> </ul>                                                                                                                                                                                                                            |
| 2 <sup>nd</sup> protocol follow-up  | 183 days after first Ablation Procedure (6 Months)  | ± 14 days      | <ul style="list-style-type: none"> <li>• AF/AT Recurrence Assessment</li> <li>• Patient Current Cardiac Medications</li> <li>• 24-Hour Holter</li> <li>• Adverse Events (*)</li> </ul>                                                                                                                                                                                                                            |
| 3 <sup>rd</sup> protocol follow-up  | 364 days after first Ablation Procedure (12 Months) | ± 14 days      | <ul style="list-style-type: none"> <li>• AF/AT Recurrence Assessment</li> <li>• Patient Current Cardiac Medications</li> <li>• 12-Lead ECG</li> <li>• 7-Day Holter</li> <li>• UCG (Size of LA, LVEDD, LVEF)</li> <li>• Adverse Events (*)</li> </ul>                                                                                                                                                              |
| Follow-up every 6 months thereafter | Follow-up every 6 months after 12 Months            | ± 14 days      | <ul style="list-style-type: none"> <li>• AF/AT Recurrence Assessment</li> <li>• Patient Current Cardiac Medications</li> <li>• 12-Lead ECG</li> <li>• 24-Hour Holter</li> </ul>                                                                                                                                                                                                                                   |

|  |  |  |                      |
|--|--|--|----------------------|
|  |  |  | • Adverse Events (*) |
|--|--|--|----------------------|

394 (\*) This is only to be performed when applicable.

395

396

397

## 8.2 ADVERSE EVENTS

398

399

400

Definition of adverse event, adverse device effect, serious adverse event, and serious adverse device effect according to ISO 14155:

401

8.2.1 Adverse event (AE) is defined as any untoward medical occurrence in a patient or clinical investigation patient.

402

403

8.2.2 Serious adverse event (SAE) is defined as an adverse event that led to a serious deterioration in the health of a patient that resulted in death, a life-threatening illness or injury, permanent impairment of a body structure or a body function, in-patient hospitalization or prolongation of existing hospitalization; and medical or surgical intervention to prevent permanent impairment to a body structure or a body function.

404

405

406

407

408

409

**Table 2-Possible Adverse Events**

| <b>Cardiac Events</b>                            | <b>Non-cardiac Events</b>           |
|--------------------------------------------------|-------------------------------------|
| Myocardial infarction                            | Air embolism                        |
| Coronary artery injury                           | Anesthesia reaction                 |
| Pericardial effusion/cardiac tamponade           | Cerebrovascular accident            |
| Pulmonary vein stenosis                          | High creatinine phosphokinase (CPK) |
| Heart failure                                    | Infections                          |
| Component damage to ICD or implantable pacemaker | Local hematomas/ecchymosis          |
| Death                                            | Phrenic nerve damage                |
| Endocarditis                                     | Pneumonia                           |
| Hypotension                                      | Pneumothorax                        |
| Inadvertent AV block (complete heart block)      | Pulmonary edema                     |
| Vessel wall/valvular damage or insufficiency     | Pulmonary embolism                  |
| Pericarditis                                     | Pleural effusion                    |
| Pulmonary vein stenosis                          | Pseudoaneurysm                      |
| Ventricular arrhythmia requiring defibrillation  | Respiratory depression              |
|                                                  | Skin burns                          |
|                                                  | Syncope                             |
|                                                  | Transient ischemic attack           |
|                                                  | Vasovagal reactions                 |
|                                                  | cancer                              |

410

411

8.2.3 Procedure for Recording and Reporting Adverse Events

412

8.2.3.1 Safety surveillance and reporting will be done for all patients enrolled in the investigation, regardless of the randomization group.

413

414

8.2.3.2 All serious adverse events and all adverse device effects are to be documented and reported to the sponsor immediately.

415

- 416 8.2.3.3 Non-serious adverse events documentation and reporting are limited to  
 417 cardiovascular and neurovascular events. Within cardiovascular, all arrhythmias  
 418 that require a medical assessment and/or intervention should be documented as an  
 419 adverse event.
- 420 8.2.3.4 Should an AE occur, record AE information in the hospital records, document the  
 421 information into the adverse event case report form (CRF) as soon as possible. By  
 422 completing the CRF, the sponsor will be notified.
- 423 8.2.3.4.1 Refer to appendices “Data Collection” and “Data Collection Method.”
- 424 8.2.3.4.2 Access the eCRF application.
- 425 8.2.3.4.3 Select the visit the AE is related to or indicate it as an unscheduled visit.
- 426 8.2.3.4.4 Enter adverse event information into the AE Notification section of the  
 427 CRF.
- 428 ✓ Date the AE occurred;
- 429 ✓ Date the center investigator or delegate became aware of the AE;
- 430 ✓ Main complaints/symptoms of the AE;
- 431 ✓ Initial diagnosis of the AE;
- 432 ✓ Potential cause of the AE;
- 433 ✓ Pre-existing medical conditions related to the AE;
- 434 ✓ The seriousness of the AE;
- 435 ✓ Device relationship to AE; and
- 436 ✓ Status of the AE.
- 437 8.2.3.5 When the AE occurs, investigators should report to the Ethic Committee.
- 438 **NOTE:** If an adverse event is documented at the patient’s last follow-up visit (12  
 439 months), both the notification and follow-up information on the AE CRF is to be  
 440 provided to the sponsor. Pre-existing cardiac conditions that require planned  
 441 hospitalization are not to be considered as AE.

### 442 8.3 PATIENT DEATH

- 443
- 444
- 445 8.3.1 Procedure for Recording and Reporting Patient Death
- 446 Safety surveillance and reporting will be done for all patients enrolled in the investigation,  
 447 regardless of the randomization group. All Patient Deaths are to be documented and  
 448 reported to the sponsor immediately. Refer to appendices “Data Collection” and “Data  
 449 Collection Method”;
- 450 8.3.1.1 Access the eCRF application;
- 451 8.3.1.2 Select the visit the patient death is related to or indicate it as an unscheduled  
 452 visit.
- 453 8.3.1.3 Enter patient death information into the Patient Death CRF:
- 454 ✓ Date the death occurred;
- 455 ✓ Date the center investigator or delegate became aware of the death;
- 456 ✓ Place where the death occurred (e.g., hospital, nursing home, patient’s  
 457 home);
- 458 ✓ If death was witnessed;
- 459 ✓ If an autopsy was performed;
- 460 ✓ Temporal cause of death
- 461 ✓ The primary cause of death;
- 462 ✓ Details regarding death; and
- 463 ✓ If details of a serious adverse event associated with death are known by the  
 464 center/investigator/delegate.
- 465 8.3.1.4 Submit the CRF. When the CRF is submitted, an alert is generated notifying the  
 466 sponsor.

- 467 8.3.1.5 The CRF must be authorized by the principal investigator or delegated  
468 co-investigator.
- 469 8.3.1.6 Patient death is an early conclusion to the patient's participation in the  
470 investigation. Complete Termination CRF.
- 471 8.3.1.7 The investigator must notify the EC or IRB, if appropriate, in accordance with  
472 national and local laws and regulations.

#### 473 8.4 EARLY CONCLUSION TO PATIENT PARTICIPATION

474 All reasonable efforts should be made to retain the patient in the clinical investigation  
475 until completion of the clinical investigation.

- 476 8.4.1 A patient/family member may request to withdraw from the investigation at any time;  
477 she/he may do so without having to justify it and without affecting her/his relationship  
478 with the investigator.
- 479 8.4.2 A patient dies. Refer to section 8.3, "Patient Death";
- 480 8.4.3 An investigator may withdraw a patient from the investigation at any time if she/he thinks  
481 it is in the patient's best interest;
- 482 8.4.4 An investigator may withdraw a patient if the patient does not attend their scheduled visits  
483 and/or is not compliant with the protocol regimen. A patient will be considered "lost to  
484 follow-up" when 3 attempts to contact the patient were unsuccessful.
- 485 8.4.5 Should a patient withdraw and conclude participation in the investigation, document the  
486 information in the termination case report form (CRF) as soon as possible. By completing  
487 the CRF, the sponsor will be notified.
- 488 8.4.5.1 Refer to appendices "Data Collection" and "Data Collection Method."
- 489 8.4.5.2 Access the eCRF application.
- 490 8.4.5.3 Enter patient early conclusion information into the Termination CRF.
- 491 ✓ Date the early conclusion occurred;
- 492 ✓ Reason for the early conclusion;

#### 493 8.5 DEVIATIONS

494 A deviation is defined as a situation in which there is a non-compliance with the protocol.

- 495 8.5.1 Patient informed consent is not approved by Ethics Committee;
- 496 8.5.2 Patient informed consent is not signed and/or dated by the patient and/or investigator;
- 497 8.5.3 Study-specific procedure was performed before the Patient Informed Consent was signed  
498 and dated by the patient;
- 499 8.5.4 Investigational required visit not performed;
- 500 8.5.5 Investigational required visit performed outside the window;
- 501 8.5.6 24-hour or 7-day Holter not performed/data corrupted and not available;
- 502 8.5.7 ECG not performed/data corrupted and not available;
- 503 8.5.8 Should a deviation occur, document the information in the deviation case report form  
504 (CRF). By completing the CRF, the sponsor will be notified.

505 **NOTE:** When a deviation occurs after enrolment for patient consent, record the information in the  
506 hospital record, immediately document the information in the deviation and termination case report  
507 form (CRF). By completing the CRF, the sponsor will be notified.

#### 508 8.6 ENROLMENT

509 Enrolment activities are performed after patients are screened and may occur prior to or at the  
510 same time as the baseline visit. A patient who meets the inclusion criteria and does not meet the  
511 exclusion criteria is eligible to participate in the investigation.

- 512 8.6.1 Inform the eligible patient about the investigation and provide written consent to the  
513 patient. The process of obtaining written consent from an eligible patient needs to comply  
514 with the Declaration of Helsinki, International Standards Organization (ISO) 14155-1,  
515 and applicable local laws and regulations.



- 522 8.6.2 File the second original appropriately in the Investigator Study Binder (ISB).  
523  
524 **8.7 BASELINE VISIT**  
525  
526 All baseline activities are performed after the patient is enrolled in the investigation and no  
527 more than  
528 30 days prior to undergoing the catheter ablation procedure. The following information will  
529 be collected at the baseline visit either from hospital records or through patient interaction:  
530 8.7.1 Patient Demographics & Physical Examination:  
531 8.7.1.1 Record the age;  
532 8.7.1.2 Record the gender;  
533 8.7.1.3 Provide the most recent value (within the last month) of the patient's height;  
534 8.7.1.4 Provide the most recent value (within the last month) of the patient's weight; and  
535 8.7.1.5 Record the blood pressure.  
536 8.7.2 Patient Cardiovascular History  
537 8.7.2.1 Provide the most recent value (within the last month) of the New York Heart  
538 Association (NYHA) classification;  
539 8.7.2.2 Provide the most recent value (within the last month) of the left ventricular  
540 ejection fraction (LVEF) derived from echocardiography and;  
541 8.7.2.3 Provide the most recent value of the left atrial size derived from echocardiography.  
542 8.7.3 Patient Cardiac Medication  
543 8.7.3.1 Identify the drug category of the cardiac medications the patient is taking currently;  
544 and  
545 8.7.3.2 Document the type of antiarrhythmic the patient was taking in the past to manage AF.  
546 8.7.4 Patient Medical History  
547 8.7.4.1 Indicate the pre-existing cardiac conditions and cardiac procedures; and  
548 8.7.4.2 Indicate the non-cardiac medical conditions.  
549 8.7.5 Patient AF History  
550 8.7.5.1 Record the date (year) the patient first experienced AF;  
551 8.7.5.2 Record the number of previous cardioversions for ATAs.  
552 8.7.5.3 Indicate if the patient experienced any arrhythmias other than AF.  
553 8.7.5.4 Calculate CHA<sub>2</sub>DS<sub>2</sub>-VASc Score  
554 8.7.6 ECG Information: provide the information of the most recent ECG performed (heart rate,  
555 rhythm on ECG, QT information, general findings).  
556 8.7.7 Record baseline visit information in hospital records, complete the Baseline Case Report  
557 Forms. Every effort would be made to notify the sponsor within 14 days of the visit. The  
558 CRF must be authorized by the principal investigator or delegate.  
559  
560 **8.8 ABLATION PROCEDURE**  
561  
562 8.8.1 All patients will undergo catheter ablation using radiofrequency energy in the cardiac  
563 electrophysiology lab as per site practice. Patients may undergo pre-ablation  
564 transesophageal echocardiography or LA CTA scan as per site practice. If such imaging is  
565 performed, and a LA thrombus is detected, the ablation procedure should be deferred until  
566 the thrombus is resolved.  
567 8.8.2 Randomisation: prior to the ablation procedure, randomize the patient. For the  
568 randomization instructions, refer to "Appendix Randomisation Instructions."  
569 8.8.3 Ablation Procedure  
570 8.8.3.1 A decapolar diagnostic catheter will be placed in the coronary sinus (CS).  
571 8.8.3.2 All procedures will be performed via transeptal access to the LA.

- 572 8.8.3.3 After transseptal access, patients should be anticoagulated with intravenous heparin  
 573 to maintain an ACT of 250-350 seconds.  
 574 8.8.3.4 Pulmonary venography should be performed before ablation. PV stenosis should be  
 575 documented in CRF.  
 576 8.8.3.5 A mapping catheter (Pentaray, Lasso Sensor or Lasso) should be used for both  
 577 anatomical mapping and confirmation of pulmonary vein isolation.  
 578 8.8.3.6 Ablation will be performed using a market-approved open irrigated tip ablation  
 579 catheter (smart-touch contact force sensing ablation catheter). In Table 3, the  
 580 maximum authorized power and irrigation settings are shown.  
 581

**Table 3-Irrigated ablation catheter maximum authorized settings**

|                      |              |
|----------------------|--------------|
| <b>Power</b>         | 30-40 W      |
| <b>Flow Rate</b>     | 17-30 ml/min |
| <b>Contact force</b> | 5-30 g       |

- 583  
 584 8.8.3.7 Continuous impedance monitoring should be employed and RF should be  
 585 discontinued if a  $\geq 10$  ohm impedance rise or drop is observed.  
 586 8.8.3.8 All procedures will be guided using a cardiac mapping system-CARTO3 System,  
 587 Biosense Webster Inc. The mapping system will be used to construct a 3-D  
 588 reconstruction (shell) of the LA, the PV, the CS, and RA if required. LA anatomy  
 589 was created with a multipolar mapping catheter (Lasso sensor or Pentaray,  
 590 Biosense Webster) or smart touch contact force sensing ablation catheter. If AF did  
 591 not convert to SR after CPVI, SR was restored by electrical cardioversion. The  
 592 number of collected surface points should be at least 150 for LA voltage mapping  
 593 using smart touch contact force sensing catheter with over 5 g per point. If the AF  
 594 transforms to atrial flutter or tachycardia during ablation, LA voltage mapping will  
 595 be conducted until SR was achieved by ablation.  
 596 8.8.3.9 After the geometry is completed, the ablation catheter is used to accurately mark the  
 597 orifices of PVs on the model. After the substrate map, the region and size of LVA  
 598 and the average voltage will be calculated.  
 599  
 600 8.8.4 Ablation Strategies  
 601 8.8.4.1 A description of the specific catheter ablation strategies is detailed in the following  
 602 sections: see 8.8.5. and 8.8.6.  
 603 “CPVI plus” group: CPVI plus LVA ablation if LVA existed; See 8.8.6.  
 604 Control group: CPVI alone regardless of LVA (see 8.8.5).  
 605 8.8.5 Wide Circumferential Pulmonary Vein Antrum Isolation  
 606 8.8.5.1 Through transseptal accesses, the mapping and ablation catheters will be advanced  
 607 into the LA, followed by reconstruction of the LA and PV anatomy using the  
 608 CARTO3 system.  
 609 8.8.5.2 The ostia and the antra of the PVs will be defined by pulmonary venography, 3D  
 610 electroanatomical shell, and local potentials.  
 611 8.8.5.3 The mapping catheter will then be placed sequentially within each of the PV antra to  
 612 record PV potentials. Circumferential RF lesions will then be placed at least 1-2  
 613 cm outside of the PV ostia to encircle and electrically isolate each of the PV antra  
 614 in order to avoid PV stenosis.  
 615 8.8.5.4 As each antrum is encircled, the mapping catheter should be used to confirm  
 616 electrical isolation. Isolation of the PV antrum will be considered complete when  
 617 all PV potentials within each antrum are abolished, as recorded by the Pentaray,  
 618 Lasso Sensor or Lasso mapping catheter.  
 619 8.8.5.5 No intravenous antiarrhythmics should be used during ablation to change AF cycle  
 620 length or to help regularize/terminate AF if AF is sustainable after CPVI.  
 621 8.8.5.6 If AF terminates or converts to AT before isolation, ablation should not be  
 622 discontinued until PVs are isolated.  
 623 8.8.5.7 Ablation lesion tags should be added to the model surface using the Vistag<sup>TM</sup>. The  
 624 settings of Vistag<sup>TM</sup> were as follows:

625  
626**Table 4-Settings for Vistag™**

|                               |        |
|-------------------------------|--------|
| <b>Respiration Adjustment</b> | 2.5 mm |
| <b>Stability Min. Time</b>    | 3 ms   |
| <b>Contact force</b>          | 5-30 g |

627  
628  
629  
630  
631  
632  
633  
634  
635  
636  
637  
638  
639  
640  
641  
642  
643  
644  
645  
646  
647  
648  
649  
650  
651  
652  
653  
654  
655  
656  
657  
658  
659  
660  
661  
662  
663  
664  
665  
666  
667  
668  
669  
670  
671  
672  
673  
674  
675  
676  
677

- 8.8.5.8 The target ablation index (AI) was 500 for anterior, 450 for roof, and 400 for inferior and posterior segments.
- 8.8.6 CPVI Plus LVA Ablation in the LA during SR
- 8.8.6.1 Patients randomized to the study group will first undergo wide CPVI as described in Section 8.8.5. The endpoint will be complete isolation of all four PV antra as detailed above.
- 8.8.6.2 After sedation, Cardioversion with direct current (biphased 200 J or monophased 360 J) should be applied if AF is present following CPVI.
- 8.8.6.2.1 If the rhythm is converted to SR, the times and energy should be recorded;
- 8.8.6.3 If organized AT with consistent cycle length occurs during ablation, electrophysiologic mapping and ablation should be performed until conversion to SR.
- 8.8.6.4 Electrophysiologic voltage substrate mapping under SR with smart-touch contact force with over 5 g per point.
- 8.8.6.4.1 At least 150 surface points should be mapped;
- 8.8.6.4.2 Bipolar recordings are to be filtered at 30-300 Hz.
- 8.8.6.5 LA Substrate Ablation
- 8.8.6.5.1 After voltage mapping with the setting of Color bar 0.1-0.5 mV, the area with voltage less than 0.1 mV is identified as a dense scar. LVA was defined as areas with amplitude less than 0.5 mV in more than 3 adjacent low-voltage points with space difference of 0.5 cm. LVA burden was defined as the proportion of LVA over entire LA surface.
- 8.8.6.5.1.1 The endpoint of ablation: all the electrograms in LVA should be ablated down to 0.1 mV to create a dense scar or box isolation surrounding LVA.
- 8.8.6.5.1.2 If the distance between two LVA or LVA to electrical barriers is less than 1 cm, the ablation lines will be designed to close the “channel”.
- 8.8.6.6 Ablation catheter will be withdrawn into the right atrium. CTI ablation will proceed if typical atrial flutter was recorded before the procedure or present during the ablation procedure.
- 8.8.6.7 All ablation lines should be assessed with bidirectional conduction block if linear ablation was applied. Box isolation should be assessed by dissociated electric activities with high output pacing inside the box area (10 mA, 2 ms). Homogenized areas should be checked with the non-capture property also by high output pacing. All assessment segments should be recorded.
- 8.8.6.7.1 **To assess the block of CTI:** the CS catheter is always set as position reference and the proximal electrodes are placed at the ostium of CS. Activation mapping is recommended for assessment:
- 8.8.6.7.1.1 ABLd will be placed at the lateral side of the CTI line as possible as close to the lower RA:
- 8.8.6.7.1.1.1 Pacing from ABLd (S1S1 500 ms), segments should be recorded after consistent capture. The interval between stimulation spike and CSp will be measured as “LRA-S1.”
- 8.8.6.7.1.1.2 Pacing from CSp (S1S1 500 ms), segments should be recorded after consistent capture. The interval between stimulation spike and ABLd will be measured as “CSp-S1.”
- 8.8.6.7.1.2 The ABLd will be moved more laterally away from the CTI line (approximately 1 cm):
- 8.8.6.7.1.2.1 Pacing from ABLd (S1S1 500 ms), segments should be

- 678 recorded after consistent capture. The interval between  
 679 stimulation spike and CSp will be measured as “LRA-S2.”
- 680 8.8.6.7.1.2.2 Pacing from CSp (S1S1 500 ms), segments should be  
 681 recorded after consistent capture. The interval between  
 682 stimulation spike and ABLd will be measured as “CSp-S2.”
- 683 8.8.6.7.1.3 The criteria for bidirectional block:
- 684 8.8.6.7.1.3.1 Counterclockwise conduction block: LRA-S1 > LRA-S2.  
 685 8.8.6.7.1.3.2 Clockwise conduction block: CSp-S1 > CSp-S2.
- 686 8.8.6.7.2 **To assess the block of roof line:** the mapping catheter will be placed into  
 687 LAA. The electrode pair near the roof is chosen as LAA recording  
 688 electrodes:
- 689 8.8.6.7.2.1 ABLd will be positioned on the posterior wall at the middle of two  
 690 PV ablation circles nearby the roof line (PS):
- 691 8.8.6.7.2.1.1 Pacing from LAA (S1S1 500 ms), segments should be  
 692 recorded after consistent capture. The interval between  
 693 stimulation spike and ABLd will be measured as  
 694 “LAA-PS.”
- 695 8.8.6.7.2.1.2 Pacing from ABLd (S1S1 500 ms), segments should be  
 696 recorded after consistent capture. The interval between  
 697 stimulation spike and LAA will be measured as “PS-LAA.”
- 698 8.8.6.7.2.2 The ABLd will be moved more inferiorly away from the roof line  
 699 (approximately 1 cm):
- 700 8.8.6.7.2.2.1 Pacing from LAA (S1S1 500 ms), segments should be  
 701 recorded after consistent capture. The interval between  
 702 stimulation spike and ABLd will be measured as “LAA-PI.”
- 703 8.8.6.7.2.2.2 Pacing from ABLd (S1S1 500 ms), segments should be  
 704 recorded after consistent capture. The interval between  
 705 stimulation spike and LAA will be measured as “PI-LAA”
- 706 8.8.6.7.2.3 The criteria for bidirectional block:
- 707 8.8.6.7.2.3.1 Conduction from anterior to posterior has been blocked:  
 708 LAA-PS > LAA-PI.
- 709 8.8.6.7.2.3.2 Conduction from posterior to anterior has been blocked:  
 710 PS-LAA > PI-LAA.
- 711 8.8.6.7.2.3.3 If the posterior wall cannot be captured because of  
 712 isolation, it can be accepted as blocked.
- 713 8.8.6.7.2.4 The criteria for box isolation
- 714 8.8.6.7.2.4.1 The endpoint of Box isolation non-capture by high output  
 715 pacing within box area.
- 716
- 717 8.8.6.7.3 **To assess the block of anterior or lateral mitral line:**
- 718 The mapping catheter will be placed into LAA. A quick activation  
 719 map should be performed to check the bidirectional conduction  
 720 block by pacing on both sides at 500 ms.
- 721 8.8.6.8 If the assessment of the conduction block does not meet the criteria, the next steps  
 722 are as follows:
- 723 8.8.6.8.1 Continue linear ablation along with the previous lesion until blocked;
- 724 8.8.6.8.2 If a complete linear block cannot ever be achieved in 30 min, despite the  
 725 investigator's best efforts, then this should be documented in the Ablation  
 726 Case Report Form. This, however, would not be considered a protocol  
 727 deviation.
- 728 8.8.6.9 **Non-PV triggers or concomitant arrhythmia ablation:**
- 729 8.8.6.9.1 Further ablation should be performed, if non-PV triggers, atrial  
 730 tachycardias, or supraventricular tachycardias were present after CPVI and  
 731 LVA ablation procedure.
- 732 8.8.7 All cases will be recorded and uploaded to the core lab. Patient with the information

733 including study site number, patient number, patient name, and study group and date.

734

735

### 8.8.8 Post Ablation Activities

736

8.8.8.1 If sustained ATAs occur during the blank period, cardioversion should be undertaken within 48 hours.

737

738

8.8.8.2 Anticoagulation therapy: all patients will remain anticoagulated with warfarin to maintain an INR of 2-3 or a NOAC for a minimum of 3 months post-ablation.

739

740

8.8.8.3 Antiarrhythmic medications: antiarrhythmic medications may be continued for the first 3 months following the first ablation to avoid early recurrences. At 3 months, antiarrhythmics must be stopped to assess for clinical recurrence. The decision to use antiarrhythmics after three months, and the choice of AAD, will be left to the discretion of the investigators.

741

742

743

744

745

746

## 8.9 REQUIRED FOLLOW-UP

747

748

8.9.1 Scheduled visits will occur at 3, 6, 12 months after the first ablation procedure ( $\pm$  14 days for each time point for follow-up). The follow-up will be performed in the outpatient department clinic of each participating institution.

749

750

751

8.9.2 The Follow-Up schedule is summarized in Table 1.

752

753

8.9.3 The following information will be collected at the follow-up visit either from hospital records or through patient interaction:

754

8.9.3.1 Physical Examination

755

Collect the blood pressure;

756

8.9.3.2 Recurrence of ATAs

757

List the ATA episodes the patient experienced since the last visit;

758

Provide the duration of the episodes;

759

8.9.3.3 Patient Cardiac Current Medication

760

Document a change in cardiac medication therapy since the last visit.

761

8.9.3.4 ECG Information

762

Provide the information from ECG performed during the visit (heart rate, rhythm, QT information, and other findings).

763

764

8.9.3.5 24-hour Holter

765

List the ATA episodes collected by the 24-hour Holter;

766

Provide the duration of episodes.

767

8.9.4 At the follow-up of 12 months, it is recommended that patients have a final standard transthoracic echocardiogram to assess left atrial size, valvular heart disease, and ejection fraction. 7-day Holter will also be performed.

768

769

770

## 8.10 REPEAT ABLATION PROCEDURES

771

8.10.1 Blanking Period after the first ablation procedure:

772

A 3-month blanking period will be employed after the first procedure as per the HRS/EHRA/ECAS expert Consensus Statement on catheter and surgical ablation of atrial fibrillation. During this blanking period, recurrences of ATAs will not be counted and repeat procedures should not be performed in the first 3 months after the first ablation.

773

774

775

776

777

8.10.2 Repeat ablation procedure in both groups:

778

8.10.2.1 During the second procedure in both arms, identification of conduction gaps between the PVs and LA should be identified. Gaps should be targeted for ablation to re-isolate the PV antra.

779

780

781

8.10.2.2 Repeat ablation in both arms will be performed as STABLE-SR-III 8.8.6.

782

783

## 9 RISK DESCRIPTION AND MINIMIZATION

There are no data suggesting that the risks as reported in section 8.2 Adverse Events are any higher with one strategy over the other. In fact, as shown in our STABLE-SR pilot study, this novel approach was not associated with any increased risk over CPVI alone. Even fluoroscopic exposure time and procedural time were not significantly different between the two arms.

## 10 INVESTIGATION ORGANIZATION

### 10.1 INVESTIGATION MANAGEMENT

The organization that takes responsibility for the initiation and/or implementation and coordination of the investigation is The First Affiliated Hospital of Nanjing Medical University, located at:

300 Guangzhou Road  
Nanjing, Jiangsu Province  
P.R. China  
Tel: +86 25 68303117

10.1.1 Sponsor's responsibilities are in accordance with applicable ISO 14155 guidelines;

10.1.2 This includes but is not limited to the following activities:

10.1.2.1 Select the clinical investigators;

10.1.2.2 Activate the study centers after receipt of the required documentation;

10.1.2.3 Develop the study database, and perform the analysis;

10.1.2.4 Sign off the clinical investigational plan before the start of the investigation or after modifications to the protocol;

10.1.2.5 Reviewing collected data and investigation documentation for completeness and accuracy;

10.1.2.6 Ensure that all adverse events and adverse device effects are reported and reviewed by the clinical investigator(s) and where appropriate that all serious adverse events and serious adverse device effects are reported to the relevant authorities and Ethics Committee(s) and or safety monitoring committee(s).

### 10.2 CLINICAL COORDINATING INVESTIGATOR

The clinical coordinating investigator of the STABLE-SR III investigation is:  
Minglong Chen, M.D.

Department of Cardiology  
300 Guangzhou Road  
Nanjing, P.R. China, 210029  
Tel: +86 13809000791  
E-mail: chenminglong@njmu.edu.cn

### 10.3 INVESTIGATOR

An investigator is defined as an individual and/or institution responsible for the conduct of a clinical investigation who and/or which takes the clinical responsibility for the well-being of the subjects involved.

#### 10.3.1 Investigator Responsibilities

By agreeing to this protocol, the investigators and their institutions accept to allow monitoring, audits, Ethics Committee and IRB review, and regulatory inspections that are related to the investigation. They also agree to provide authorized individuals with direct access to source data and documentation and the right to copy records, provided that such activities do not violate patient consent and patient data confidentiality:

10.3.1.1 Providing signed Investigator/Co-Investigator(s) Agreement.

10.3.1.2 Providing appropriate Ethics Committees Approved Informed Consent.

10.3.1.3 Collection and archiving of data obtained after implant and at follow-up examinations and after the investigation has been completed.

10.3.1.4 Screening and selecting appropriate patients.

840 10.3.1.5 Supporting the monitor and auditor, if applicable, in their activities to verify  
 841 compliance with the CIP, to perform source data verification and to correct the case  
 842 report forms where inconsistencies or missing values are identified.

843 10.3.2 Investigator study binder

844 The investigator will be provided with an Investigator Study Binder (ISB) at the  
 845 start of the investigation. This file contains all relevant documents necessary for  
 846 the conduct of the investigation.

847

#### 848 **10.4 ETHICAL BASIS**

849

850 This investigation will be performed in accordance with the World Medical  
 851 Association Declaration of Helsinki (Appendix C), ISO 14155, and all local legal and  
 852 regulatory requirements.

853 Prior to the start of the investigation, the clinical investigational plan will be submitted  
 854 together with its associated documents (patient information sheets, patient informed  
 855 consent forms in the local language) to the relevant Ethics Committee  
 856 (EC)/Institutional Review Board (IRB) for review. Any amendments to the protocol  
 857 should be submitted to the relevant EC/IRB. EC/IRB will be informed about SAEs and  
 858 UADEs in accordance with local and national requirements.

859

#### 860 **10.5 MONITORING**

861 It is the responsibility of the CRO to ensure proper monitoring of the investigation and  
 862 ensure that the investigation is conducted, recorded, and reported in accordance with  
 863 the Clinical Investigational Plan, the signed Clinical Study Agreement, and the  
 864 applicable laws and regulations. Monitoring will be conducted at the centers  
 865 participating in the investigation according to the standard operating procedures and  
 866 work instructions. An overview of the monitoring activities is shown in Table 5.

867

868

**Table 5-Monitoring Activities**

| Visit Type | Prompted By                                                                                                                                                                                                                                                                            | Scope of Visit  |                                                                                                    |
|------------|----------------------------------------------------------------------------------------------------------------------------------------------------------------------------------------------------------------------------------------------------------------------------------------|-----------------|----------------------------------------------------------------------------------------------------|
| Initiation | <ul style="list-style-type: none"> <li>● Receipt of essential documents for center</li> <li>● Ethics Committee (EC) approval of Protocol</li> <li>● EC approved Patient Informed Consent (PIC)</li> <li>● Agreement plus exhibits completed, signed and dated by the center</li> </ul> | No patient data | <ul style="list-style-type: none"> <li>● Train staff participating in the investigation</li> </ul> |

|           |                                                                                                                                                                                                                                                                                                                                                                                           |                                                                                                                                                                                                                                                                            |                                                                                                                                                                                                                                                                                            |
|-----------|-------------------------------------------------------------------------------------------------------------------------------------------------------------------------------------------------------------------------------------------------------------------------------------------------------------------------------------------------------------------------------------------|----------------------------------------------------------------------------------------------------------------------------------------------------------------------------------------------------------------------------------------------------------------------------|--------------------------------------------------------------------------------------------------------------------------------------------------------------------------------------------------------------------------------------------------------------------------------------------|
| Periodic  | <ul style="list-style-type: none"> <li>● Enrolment of minimum, 1 patient at the center</li> <li>● Enrolment of greater than 10 patients at the center</li> <li>● Verification of critical data before database freeze and analysis</li> <li>● Patient data quality issues identified at the center</li> <li>● Regulatory issues identified</li> <li>● Safety issues identified</li> </ul> | <ul style="list-style-type: none"> <li>● Review patient's consent, and review patient data compared to the source document</li> <li>● Generate DCFs for missing and/or inaccurate patient data recorded in the CRFs</li> <li>● Review adherence to the protocol</li> </ul> | <ul style="list-style-type: none"> <li>● Resolve outstanding issues from previous monitoring visits</li> <li>● Meet with delegated center staff to review and resolve issues and DCFs in a report</li> <li>● Retrain staff (center) conducting the investigation when necessary</li> </ul> |
| Close Out | <ul style="list-style-type: none"> <li>● All patients enrolled at the center completed participation in the protocol</li> </ul>                                                                                                                                                                                                                                                           | <ul style="list-style-type: none"> <li>● Review patient's consent, and review patient data compared to the source document</li> <li>● Generate DCFs for missing and/or inaccurate patient data recorded in the CRFs</li> <li>● Review adherence to the protocol</li> </ul> | <ul style="list-style-type: none"> <li>● Resolve outstanding issues from previous monitoring visits</li> <li>● Meet with delegated center staff to review and resolve issues and DCFs in a report</li> <li>● Retrain staff (center) conducting the investigation when necessary</li> </ul> |

869  
870  
871  
872  
873  
874  
875  
876

#### 10.6 STUDY REPORT AND PUBLICATION POLICY

After the conclusion of the investigation, an integrated clinical and statistical report shall be written by the clinical coordinating investigator. The first publication will contain all data from all sites.



877  
878**11 APPENDIX A: ABBREVIATIONS**

| Abbreviation | Description                              |
|--------------|------------------------------------------|
| ACT          | Activated Clotting Time                  |
| ADE          | Adverse Device Effect                    |
| AE           | Adverse Event                            |
| AF           | Atrial Fibrillation                      |
| AT           | Atrial Tachycardia                       |
| CRF          | Case Report Form                         |
| EC           | Ethics Committee                         |
| eCRF         | Electronic Case Report Form              |
| ECG          | Electrocardiogram                        |
| EGM          | Intracardiac Electrograms                |
| FU           | Follow-Up                                |
| INR          | International Normalized Ratio           |
| LA           | Left Atrium                              |
| MA           | Mitral Annulus                           |
| MRI          | Magnetic Resonance Imaging               |
| CPVI         | Circumferential Pulmonary Vein Isolation |
| RA           | Right Atrium                             |
| SAE          | Serious Adverse Event                    |

879  
880

881 **12 APPENDIX B: DATA COLLECTION**  
 882

| Assessments                                            | Baseline/<br>Pre-Ablation | Pre-Discharge | 3 M<br>[Days<br>76-104] | 6 M<br>[Days<br>166-210] | 12 M<br>[Days<br>330-420] | every<br>6 months<br>thereafter |
|--------------------------------------------------------|---------------------------|---------------|-------------------------|--------------------------|---------------------------|---------------------------------|
| Clinic visit                                           | X                         | /             | X                       | X                        | X                         | X                               |
| Informed Consent                                       | X                         |               |                         |                          |                           |                                 |
| Demographics                                           | X                         |               |                         |                          |                           |                                 |
| Medical history                                        | X                         |               |                         |                          |                           |                                 |
| AF status                                              | X                         |               |                         |                          |                           |                                 |
| Past and current<br>Cardiac medication                 | X                         | X             | X                       | X                        | X                         | X                               |
| Current<br>anticoagulation<br>regime                   | X                         | X             | X                       | X                        | X                         | X                               |
| ECG                                                    | X                         |               |                         |                          | X                         | X                               |
| 24h Holter                                             | X                         |               | X                       | X                        |                           | X                               |
| 7days Holter                                           |                           |               |                         |                          | X                         |                                 |
| UCG                                                    | X                         |               |                         |                          | X                         |                                 |
| TEE or CT                                              | X                         |               |                         |                          |                           |                                 |
| TTE                                                    | X                         |               |                         |                          |                           | X                               |
| AF/AT/AFL<br>recurrence                                |                           | X             | X                       | X                        | X                         | X                               |
| Repeat ablation                                        |                           | X             | X                       | X                        | X                         | X                               |
| Adverse events                                         | X                         | X             | X                       | X                        | X                         | X                               |
| Major clinical events<br>as defined in the<br>protocol | X                         | X             | X                       | X                        | X                         | X                               |

883  
884

885 **13 APPENDIX C: RANDOMISATION INSTRUCTIONS**

886

887 Central randomization is used in this investigation. You must log in the Automated  
888 Randomisation System via the internet. Each patient will be given a random number.

889

890

891 **APPENDIX D: REFERENCES**

- 892
- 893 1. Haïssaguerre M, Jaïs P, Shah DC, et al. Spontaneous initiation of atrial fibrillation by ectopic beats  
894 originating in the pulmonary veins. *N Engl J Med.* 1998;339(10):659-666.
- 895 2. Pappone C, Rosanio S, Oreto G, et al. Circumferential radiofrequency ablation of pulmonary vein  
896 ostia: A new anatomic approach for curing atrial fibrillation. *Circulation.* 2000;102(21):2619-2628.
- 897 3. Ouyang F, Bänsch D, Ernst S, et al. Complete isolation of left atrium surrounding the pulmonary  
898 veins: new insights from the double-Lasso technique in paroxysmal atrial fibrillation. *Circulation.*  
899 2004;110(15):2090-2096.
- 900 4. Camm AJ, Kirchhof P, Lip GY, et al. Guidelines for the management of atrial fibrillation: the Task  
901 Force for the Management of Atrial Fibrillation of the European Society of Cardiology (ESC). *Eur*  
902 *Heart J.* 2010;31(19):2369-2429.
- 903 5. Ouyang F, Tilz R, Chun J, et al. Long-term results of catheter ablation in paroxysmal atrial  
904 fibrillation: lessons from a 5-year follow-up. *Circulation.* 2010;122(23):2368-2377.
- 905 6. Reddy VY, Dukkipati SR, Neuzil P, et al. Randomized, Controlled Trial of the Safety and  
906 Effectiveness of a Contact Force-Sensing Irrigated Catheter for Ablation of Paroxysmal Atrial  
907 Fibrillation: Results of the TactiCath Contact Force Ablation Catheter Study for Atrial Fibrillation  
908 (TOCCASTAR) Study. *Circulation.* 2015;132(10):907-915.
- 909 7. Natale A, Reddy VY, Monir G, et al. Paroxysmal AF catheter ablation with a contact force sensing  
910 catheter: results of the prospective, multicenter SMART-AF trial. *J Am Coll Cardiol.*  
911 2014;64(7):647-656.
- 912 8. Berruezo A, Tamborero D, Mont L, et al. Pre-procedural predictors of atrial fibrillation recurrence  
913 after circumferential pulmonary vein ablation. *Eur Heart J.* 2007;28(7):836-841.
- 914 9. Kornej J, Hindricks G, Shoemaker MB, et al. The APPLE score: a novel and simple score for the  
915 prediction of rhythm outcomes after catheter ablation of atrial fibrillation. *Clin Res Cardiol.*  
916 2015;104(10):871-876.
- 917 10. Chen M, Yang B, Chen H, et al. Randomized comparison between pulmonary vein antral isolation  
918 versus complex fractionated electrogram ablation for paroxysmal atrial fibrillation. *J Cardiovasc*  
919 *Electrophysiol.* 2011;22(9):973-981.
- 920 11. Verma A, Jiang CY, Betts TR, et al. Approaches to catheter ablation for persistent atrial fibrillation.  
921 *N Engl J Med.* 2015;372(19):1812-1822.
- 922 12. Lin Y, Ju W, Yang B, et al. Does linear ablation and defragmentation really improve the success rate  
923 of persistent AF? Follow-up results and electrophysiological findings from 169 consecutive patients.  
924 *Int J Cardiol.* 2013;168(1):452-457.
- 925 13. Rolf S, Kircher S, Arya A, et al. Tailored atrial substrate modification based on low-voltage areas in  
926 catheter ablation of atrial fibrillation. *Circ Arrhythm Electrophysiol.* 2014;7(5):825-833.
- 927 14. Kottkamp H, Bender R, Berg J. Catheter ablation of atrial fibrillation: how to modify the substrate. *J*  
928 *Am Coll Cardiol.* 2015;65(2):196-206.
- 929 15. Kottkamp H, Berg J, Bender R, Rieger A, Schreiber D. Box Isolation of Fibrotic Areas (BIFA): A  
930 Patient-Tailored Substrate Modification Approach for Ablation of Atrial Fibrillation. *J Cardiovasc*  
931 *Electrophysiol.* 2016;27(1):22-30.
- 932 16. Cutler MJ, Johnson J, Abozguia K, et al. Impact of Voltage Mapping to Guide Whether to Perform  
933 Ablation of the Posterior Wall in Patients With Persistent Atrial Fibrillation. *J Cardiovasc*  
934 *Electrophysiol.* 2016;27(1):13-21.
- 935 17. Mohanty S, Mohanty P, Di Biase L, et al. Long-term follow-up of patients with paroxysmal atrial  
936 fibrillation and severe left atrial scarring: comparison between pulmonary vein antrum isolation only  
937 or pulmonary vein isolation combined with either scar homogenization or trigger ablation. *Europace.*  
938 2017;19(11):1790-1797.
- 939 18. Lin Y, Yang B, Garcia FC, et al. Comparison of left atrial electrophysiologic abnormalities during  
940 sinus rhythm in patients with different type of atrial fibrillation. *J Interv Card Electrophysiol.*  
941 2014;39(1):57-67.
- 942 19. Yang G, Yang B, Wei Y, et al. Catheter Ablation of Nonparoxysmal Atrial Fibrillation Using  
943 Electrophysiologically Guided Substrate Modification During Sinus Rhythm After Pulmonary Vein  
944 Isolation. *Circ Arrhythm Electrophysiol.* 2016;9(2):e003382.
- 945 20. Yamaguchi T, Tsuchiya T, Nakahara S, et al. Efficacy of Left Atrial Voltage-Based Catheter  
946 Ablation of Persistent Atrial Fibrillation. *J Cardiovasc Electrophysiol.* 2016;27(9):1055-1063.
- 947 21. Yang B, Jiang C, Lin Y, et al. STABLE-SR (Electrophysiological Substrate Ablation in the Left  
948 Atrium During Sinus Rhythm) for the Treatment of Nonparoxysmal Atrial Fibrillation: A  
949 Prospective, Multicenter Randomized Clinical Trial. *Circ Arrhythm Electrophysiol.* 2017;10(11).
- 950 22. Lin WS, Tai CT, Hsieh MH, et al. Catheter ablation of paroxysmal atrial fibrillation initiated by

- 951 non-pulmonary vein ectopy. *Circulation*. 2003;107(25):3176-3183.
- 952 23. Bulava A, Hanis J, Dusek L. Clinical outcomes of radiofrequency catheter ablation of atrial  
953 fibrillation in octogenarians-10-year experience of a one high-volume center. *J Geriatr Cardiol*.  
954 2017;14(9):575-581.
- 955 24. Metzner I, Wissner E, Tilz RR, et al. Ablation of atrial fibrillation in patients  $\geq 75$  years: long-term  
956 clinical outcome and safety. *Europace*. 2016;18(4):543-549.
- 957 25. Bunch TJ, May HT, Bair TL, et al. The Impact of Age on 5-Year Outcomes After Atrial Fibrillation  
958 Catheter Ablation. *J Cardiovasc Electrophysiol*. 2016;27(2):141-146.
- 959 26. Gramley F, Lorenzen J, Knackstedt C, et al. Age-related atrial fibrosis. *Age (Dordr)*.  
960 2009;31(1):27-38.
- 961 27. Goette A, Juenemann G, Peters B, et al. Determinants and consequences of atrial fibrosis in patients  
962 undergoing open heart surgery. *Cardiovasc Res*. 2002;54(2):390-396.
- 963 28. Oakes RS, Badger TJ, Kholmovski EG, et al. Detection and quantification of left atrial structural  
964 remodeling with delayed-enhancement magnetic resonance imaging in patients with atrial  
965 fibrillation. *Circulation*. 2009;119(13):1758-1767.
- 966 29. Tuan TC, Chang SL, Tsao HM, et al. The impact of age on the electroanatomical characteristics and  
967 outcome of catheter ablation in patients with atrial fibrillation. *J Cardiovasc Electrophysiol*.  
968 2010;21(9):966-972.  
969
- 970

971

## **Supplement Protocol amendment**

972

This supplementary appendix has been provided by the investigators to give readers

973

additional materials about their work.

974

975

Supplement to: Additional low voltage area ablation in older patients with paroxysmal

976

atrial fibrillation: a randomized controlled trial (STABLE-SR-III)

977

978

**Protocol amendment**

979 Ten centers in mainland China initially participated in this randomized trial in March 2018  
980 as following:

- 981 1. The First Affiliated Hospital of Nanjing Medical University
- 982 2. The First Affiliated Hospital of Wannan Medical College
- 983 3. The Affiliated Hospital of Xuzhou Medical University
- 984 4. The Second Affiliated Hospital of Nantong University
- 985 5. The Second Hospital of Hebei Medical University
- 986 6. ZhongDa Hospital, Southeast University
- 987 7. The First Affiliated Hospital of Soochow University
- 988 8. Air Force Military Medical University
- 989 9. the Affiliated Xuzhou Hospital of Medical College of Southeast University
- 990 10. The Third Affiliated Hospital of Soochow University

991 Due to the COVID-19 pandemic and the slow enrollment than expected in some centers, we  
992 invited the following four more centers to participate the multicenter randomized control  
993 trial in June 2019. Hence, fourteen centers participated in this randomized trial.

- 994 1. The First Affiliated Hospital of Wenzhou Medical University
- 995 2. Tianjin Chest Hospital
- 996 3. The First Affiliated Hospital of Southern Medical University
- 997 4. Sir Run Run Shaw Hospital, affiliated with the Zhejiang University School of Medicine
- 998
