# Supplementary material
Source: PubMed Central journal article supplement (PMC10308299)
Supplement: jamacardiol-e231749-s002.pdf [file jamacardiol-e231749-s002.pdf]

## Supplemental Online Content

Chen H, Li C, Han B, et al; STABLE-SR-III Investigators. Circumferential pulmonary vein isolation with vs without additional low-voltage-area ablation in older patients with paroxysmal atrial fibrillation: a randomized clinical trial. *JAMA Cardiol*. Published online June 28, 2023. doi:10.1001/jamacardio.2023.1749

### eAppendix

#### eMethods

#### eReferences

**eTable 1.** Baseline characteristics of study patients (modified intention to treat)

**eTable 2.** Baseline characteristics (per-protocol set)

**eTable 3.** Procedural characteristics (modified intention to treat)

**eTable 4.** Procedural characteristics (per-protocol set)

**eTable 5.** Baseline characteristics of the four subgroups (modified intention to treat)

**eTable 6.** Procedural characteristics of four subgroups (modified intention to treat)

**eTable 7.** Baseline characteristics of the study population by LVA and treatment (modified intention to treat)

**eTable 8.** Procedural characteristics of the study population by LVA and treatment (modified intention to treat)

**eTable 9.** Baseline characteristics of the study population by LVA and treatment (per-protocol set)

**eTable 10.** Procedural characteristics of the study population by LVA and treatment (per-protocol set)

**eTable 11.** Peri-procedural safety data

**eTable 12.** Adverse events during follow-up

**eTable 13.** Baseline characteristics of the study population by sex

**eTable 14.** Hazard ratio for primary endpoint after adjustment of study centers, sex, and BMI

**eFigure 1.** Sample images of LVA distribution and the corresponding ablation strategies

**eFigure 2.** Kaplan-Meier curve of the freedom from ATA after single procedure by specificity analysis of clinical-detected event-based finding between CPVI plus and CPVI alone groups by modified intention-to-treat analysis

**eFigure 3.** Kaplan-Meier curve of the freedom from ATA after single procedure among three subgroups by modified intention-to-treat analysis

**eFigure 4.** Primary endpoint subgroup by modified intention-to-treat analysis

**eFigure 5.** Kaplan-Meier estimates of the freedom from ATA after single procedure between CPVI plus and CPVI alone groups by intention-to-treat analysis

**eFigure 6.** Kaplan-Meier estimates of the freedom from ATA after single procedure between CPVI plus and CPVI alone groups by per-protocol analysis

**eFigure 7.** Kaplan-Meier curve of the freedom from ATA after single procedure among four subgroups by per-protocol analysis

**eFigure 8.** Kaplan-Meier curve of the freedom from ATA after single procedure among three subgroups by per-protocol analysis

**eFigure 9.** Primary endpoint subgroup by per-protocol analysis

This supplemental material has been provided by the authors to give readers additional information about their work.

## eAppendix.

### Full list of investigators and participating centers, the distribution of enrolled patients in all centers

| List | Investigator                 | Center                                                                                             | CPVI plus group | CPVI alone group | Enrolled Subjects |
|------|------------------------------|----------------------------------------------------------------------------------------------------|-----------------|------------------|-------------------|
| 1    | Minglong Chen<br>Hongwu Chen | The First Affiliated Hospital of Nanjing Medical University                                        | 53              | 35               | 88                |
| 2    | Youquan Wei                  | The First Affiliated Hospital of Wannan Medical College                                            | 22              | 17               | 39                |
| 3    | Chengzong Li                 | The Affiliated Hospital of Xuzhou Medical University                                               | 15              | 14               | 29                |
| 4    | Linsheng Shi                 | The Second Affiliated Hospital of Nantong University                                               | 8               | 8                | 16                |
| 5    | Hong Du                      | The Second Hospital of Hebei Medical University                                                    | 5               | 2                | 7                 |
| 6    | Fangyi Xiao                  | The First Affiliated Hospital of Wenzhou Medical University                                        | 23              | 31               | 54                |
| 7    | Cao Zou                      | The First Affiliated Hospital of Soochow University                                                | 14              | 11               | 25                |
| 8    | Fu Yi                        | Air Force Military Medical University                                                              | 19              | 29               | 48                |
| 9    | Bing Han                     | Xuzhou Central Hospital, the Affiliated Xuzhou Hospital of Medical College of Southeast University | 27              | 37               | 64                |
| 10   | Weiming Wang                 | The Third Affiliated Hospital of Soochow University                                                | 8               | 4                | 12                |
| 11   | Chenyang Jiang               | Sir Run Run Shaw Hospital, affiliated with the Zhejiang University School of Medicine              | 15              | 17               | 32                |
| 12   | Wei Ma                       | Tianjin Chest Hospital                                                                             | 5               | 10               | 15                |
| 13   | Yuegang Wang                 | The First Affiliated Hospital of Southern Medical University                                       | 4               | 4                | 8                 |
| 14   | Long Chen                    | Zhongda Hospital, Southeast University                                                             | 1               | 0                | 1                 |
|      | Total                        |                                                                                                    | 219             | 219              | 438               |

## Steering committee (SC)

| <b>Investigator</b> | <b>Center</b>                                                                                      | <b>Country</b> |
|---------------------|----------------------------------------------------------------------------------------------------|----------------|
| Minglong Chen       | The First Affiliated Hospital of Nanjing Medical University                                        | China          |
| Bing Han            | The Affiliated Xuzhou Hospital of Medical College of Southeast University, Xuzhou Central Hospital | China          |
| Chenyang Jiang      | Sir Run Run Shaw Hospital, affiliated with the Zhejiang University School of Medicine              | China          |

## Data safety monitoring board (DSMB)

| <b>Investigator</b>                                                     | <b>Center</b>                                               | <b>Country</b> |
|-------------------------------------------------------------------------|-------------------------------------------------------------|----------------|
| Wenxi Wu (Professor of General Surgery)                                 | The First Affiliated Hospital of Nanjing Medical University | China          |
| Fumin Zhang (Professor of Cardiology)                                   | The First Affiliated Hospital of Nanjing Medical University | China          |
| Xin Yao (Professor of Respiratory Diseases)                             | The First Affiliated Hospital of Nanjing Medical University | China          |
| Hao Yu (Professor of Statistics)                                        | Nanjing Medical University                                  | China          |
| Xiuqing Wang (Member of ethics committee, protection of study subjects) | The First Affiliated Hospital of Nanjing Medical University | China          |

## Event review committee (ERC)

Event adjudicated by an independent blinded committee:

| <b>Investigator</b>               | <b>Center</b>                                           | <b>Country</b> |
|-----------------------------------|---------------------------------------------------------|----------------|
| Zhibing Lu (Electrophysiologist)  | Zhongnan Hospital of Wuhan University                   | China          |
| Lichun Wang (Electrophysiologist) | The First Affiliated Hospital of Sun Yat-Sen University | China          |
| Jiang Cao (Electrophysiologist)   | Changhai Hospital, Naval Medical University             | China          |

## Contract research organization (CRO)

| Item                                 | Title                                                      | Country |
|--------------------------------------|------------------------------------------------------------|---------|
| Contract Research Organization (CRO) | Guangzhou EnChannel Medical Information Technology Co. Ltd | China   |

## Randomization

Central randomization was issued from The First Affiliated Hospital of Nanjing Medical University. A central computerised simple randomization scheme was used. Patients and the physicians who followed up the patients were blinded to the randomization. All clinical outcomes were collected by the contract research organization (CRO).

## Core lab and independent statistical analysis

Each patient's procedure data were stored and reviewed by the core lab. Core lab would review the procedural electroanatomic map and lesion placement:

| Item                 | Title                                                                                 | Country |
|----------------------|---------------------------------------------------------------------------------------|---------|
| Core Lab             | Department of Cardiology, the First Affiliated Hospital of Nanjing Medical University | China   |
| Statistical Analysis | Nanjing Lindu Medical Technology Co., Ltd                                             | China   |

## **eMethods.**

### **Voltage mapping: impact factors and practical considerations**

The voltage of a mapping point depends on the rhythm, rate, contact force, thickness of the local tissue, inter-space of the mapping electrodes, wave front direction as well as other poorly understood tissue factors, all of which highlight the importance of a standardized approach to substrate identification<sup>1,2</sup>. Mapping in sinus rhythm, rather than in AF, was preferred in most previous studies<sup>3-7</sup>. High density mapping, which we used in our STABLE-SR, STABLE-SR-II and other studies, is a fast and time-efficient approach<sup>8-10</sup>. However, the poor contact points can over-estimate the extent of LVA. In this study, LA substrate mapping strategy and the definition of LVAs were similar to other studies<sup>3,4</sup>, but with contact force adjudication. We believe that point-by-point mapping fashion—sparsely in the healthy area, densely in areas of interest and verified by contact force—is an acceptable and practical mapping approach. Other factors, such as the inter-space of the mapping electrodes, LVA definition of the different region<sup>2</sup> and wave-front direction were not taken into consideration in our trial. Although the foregoing factors may have impact on substrate identification, our point-by-point approach with contact force adjudication was consistent and parallel in both groups, thus the impact of this potential bias is minimized. Further, we performed voltage mapping after and not before CPVI for the following reasons: 1) Pursuing mapping during sinus rhythm, post CPVI mapping can reduce the possibility of electrical cardioversion, 2) Inadequate ablation because of unstable ablation catheter movement during CPVI adjacent to the lesion line might sometimes be the new iatrogenic areas of arrhythmogenicity. These half-lesion areas need evaluation, 3) Mapping during the waiting period after CPVI does not prolong the procedure time, and allows additional time to check the durability of isolation.

## ITT analysis

In this study, the ITT analysis was conducted based on the worst-case analysis, in which all the patients who declined ablation or lost to follow-up during the blanking period were assumed to have ATA recurrence at the first 3-month follow-up.

## References

1. Wong GR NCJ, Lee G ea. Dynamic Atrial Substrate During High-Density Mapping of Paroxysmal and Persistent AF: Implications for Substrate Ablation. *JACC-Clinical Electrophysiology*. ,2019.
2. Squara F, Frankel DS, Schaller R, et al. Voltage mapping for delineating inexcitable dense scar in patients undergoing atrial fibrillation ablation: a new end point for enhancing pulmonary vein isolation. *Heart Rhythm*. 2014;11(11):1904-1911.
3. Rolf S, Kircher S, Arya A, et al. Tailored atrial substrate modification based on low-voltage areas in catheter ablation of atrial fibrillation. *Circ Arrhythm Electrophysiol*. 2014;7(5):825-833.
4. Kircher S, Arya A, Altmann D, et al. Individually tailored vs. standardized substrate modification during radiofrequency catheter ablation for atrial fibrillation: a randomized study. *Europace*. 2018;20(11):1766-1775.
5. Yamaguchi T, Tsuchiya T, Nakahara S, et al. Efficacy of Left Atrial Voltage-Based Catheter Ablation of Persistent Atrial Fibrillation. *J Cardiovasc Electrophysiol*. 2016;27(9):1055-1063.
6. Masuda M, Asai M, Iida O, et al. Additional Low-Voltage-Area Ablation in Patients With Paroxysmal Atrial Fibrillation: Results of the Randomized Controlled VOLCANO Trial. *J Am Heart Assoc*. 2020;9(13):e015927.
7. Mohanty S, Mohanty P, Di Biase L, et al. Long-term follow-up of patients with paroxysmal atrial fibrillation and severe left atrial scarring: comparison between pulmonary vein antrum isolation only or pulmonary vein isolation combined with either scar homogenization or trigger ablation. *Europace*. 2017;19(11):1790-1797.
8. Jadidi AS, Lehrmann H, Keyl C, et al. Ablation of Persistent Atrial Fibrillation Targeting Low-Voltage Areas With Selective Activation Characteristics. *Circ Arrhythm Electrophysiol*. 2016;9(3).
9. Yang B, Jiang C, Lin Y, et al. STABLE-SR (Electrophysiological Substrate Ablation in the Left Atrium During Sinus Rhythm) for the Treatment of Nonparoxysmal Atrial Fibrillation: A Prospective, Multicenter Randomized Clinical Trial. *Circ Arrhythm Electrophysiol*. 2017;10(11).
10. Yang G, Zheng L, Jiang C, et al. Circumferential Pulmonary Vein Isolation Plus Low-Voltage Area Modification in Persistent Atrial Fibrillation: The STABLE-SR-II Trial. *JACC Clin Electrophysiol*. 2022;8(7):882-891.

**eTable 1. Baseline characteristics of study patients (modified intention to treat)**

| Characteristics                              | CPVI plus, n=209 | CPVI alone, n=205 |
|----------------------------------------------|------------------|-------------------|
| Male, n (%)                                  | 107 (51.2)       | 103 (50.2)        |
| Age, years                                   | 70.4±4.4         | 70.6±4.2          |
| AF history, months                           | 24.0 (6.0, 48.0) | 14 (5.0, 48.0)    |
| BMI, kg/m <sup>2</sup>                       | 24.2±3.6         | 24.6±3.0          |
| <25, n (%)                                   | 123 (62.8)       | 122 (60.4)        |
| ≥25, n (%)                                   | 73 (37.2)        | 80 (39.6)         |
| Comorbidities, n (%)                         |                  |                   |
| Hypertension                                 | 123 (58.9)       | 132 (64.4)        |
| Diabetes                                     | 31 (14.8)        | 38 (18.5)         |
| CAD                                          | 50 (23.9)        | 46 (22.4)         |
| Stroke or TIA                                | 16 (7.7)         | 20 (9.8)          |
| Congestive heart failure                     | 2 (1.0)          | 1 (0.5)           |
| COPD                                         | 4 (2.0)          | 3 (1.5)           |
| OSAS                                         | 2 (1.0)          | 1 (0.5)           |
| CHA <sub>2</sub> DS <sub>2</sub> -VASc score | 2.2±0.9          | 2.4±1.0           |
| 1, n (%)                                     | 52 (24.9)        | 46 (22.4)         |
| 2, n (%)                                     | 78 (37.3)        | 65 (31.7)         |
| 3, n (%)                                     | 57 (27.3)        | 65 (31.7)         |
| >3, n (%)                                    | 22 (10.5)        | 29 (14.2)         |
| LAD, mm                                      | 38.8±5.4         | 38.8±5.3          |
| LVEF, %                                      | 62.5±5.3         | 62.4±5.5          |

CPVI, circumferential pulmonary vein isolation; AF, atrial fibrillation; BMI, body mass index; CAD, coronary artery disease; TIA, transient ischaemic attack; COPD, chronic obstructive pulmonary disease; OSAS, obstructive sleep apnoea syndrome; LAD, left atrial diameter; LVEF, left ventricular ejection fraction.

**eTable 2. Baseline characteristics (per-protocol set)**

| <b>Characteristics</b>                       | <b>CPVI plus, n=205</b> | <b>CPVI alone, n=200</b> |
|----------------------------------------------|-------------------------|--------------------------|
| Male, n (%)                                  | 107 (52.2)              | 100 (50.0)               |
| Age, years                                   | 70.5±3.9                | 70.6±4.1                 |
| AF history, months                           | 24.0 (6.0, 48.0)        | 13.0 (4.0, 37.5)         |
| BMI, kg/m <sup>2</sup>                       | 24.2±3.6                | 24.6±3.0                 |
| <25, n (%)                                   | 120 (58.5)              | 118 (59.9)               |
| ≥25, n (%)                                   | 72 (35.1)               | 79 (40.1)                |
| Comorbidities, n (%)                         |                         |                          |
| Hypertension                                 | 120 (58.5)              | 131 (65.5)               |
| Diabetes                                     | 31 (15.1)               | 38 (19.0)                |
| CAD                                          | 50 (24.4)               | 45 (22.5)                |
| Stroke or TIA                                | 16 (7.8)                | 20 (10.0)                |
| Congestive heart failure                     | 2 (1.0)                 | 1 (0.5)                  |
| COPD                                         | 4 (2.0)                 | 2 (1.0)                  |
| OSAS                                         | 2 (1.0)                 | 1 (0.5)                  |
| CHA <sub>2</sub> DS <sub>2</sub> -VASc score | 2.4±1.0                 | 2.2±1.0                  |
| 1, n (%)                                     | 51 (24.9)               | 43 (21.5)                |
| 2, n (%)                                     | 78 (38.0)               | 64 (32.0)                |
| 3, n (%)                                     | 54 (26.3)               | 64 (32.0)                |
| >3, n (%)                                    | 22 (10.7)               | 29 (14.5)                |
| LAD, mm                                      | 38.8±5.4                | 38.7±5.3                 |
| LVEF, %                                      | 62.4±5.3                | 62.4±5.4                 |

CPVI, circumferential pulmonary vein isolation; AF, atrial fibrillation; BMI, body mass index; CAD, coronary artery disease; TIA, transient ischemic attack; COPD, chronic obstructive pulmonary disease; OSAS, obstructive sleep apnea syndrome; LAD, left atrial diameter; LVEF, left ventricular ejection fraction.



**eTable 3. Procedural characteristics (modified intention to treat)**

| <b>Characteristics</b>            | <b>CPVI plus, n=209</b> | <b>CPVI alone, n=205</b> |
|-----------------------------------|-------------------------|--------------------------|
| ATA at baseline, n (%)            | 33 (15.8)               | 33 (16.1)                |
| AF termination during CPVI, n (%) | 67 (32.1)               | 54 (26.3)                |
| CV after CPVI, n (%)              | 13 (6.2)                | 2 (1.0)                  |
| Non-PV triggers, n (%)            | 17 (8.1)                | 20 (9.8)                 |
| Concomitant arrhythmia, n (%)     | 2 (1.0)                 | 5 (2.4)                  |
| CTI ablation, n (%)               | 24 (11.5)               | 20 (9.8)                 |
| LVA, n (%)                        | 86 (41.2)               | 88 (42.9)                |
| LVA burden 1-10%, n (%)           | 65 (75.6)               | 74 (84.1)                |
| Area, cm <sup>2</sup>             | 3.9±2.4                 | 3.6±2.6                  |
| LVA burden 11-20%, n (%)          | 15 (17.4)               | 8 (9.1)                  |
| Area, cm <sup>2</sup>             | 13.2±1.8                | 13.7±3.5                 |
| LVA burden >20%, n (%)            | 6 (7.0)                 | 6 (6.8)                  |
| Area, cm <sup>2</sup>             | 27.9±9.5                | 40.6±9.5                 |
| Total procedure time, min         | 142.5±39.3              | 139.4±42.5               |
| Begin-CPVI completed, min         | 108.9±31.5              | 106.5±28.0               |
| CPVI completed-end, min           | 33.6±19.2               | 32.8±28.0                |
| Total fluoroscopic time, min      | 9.2±5.3                 | 9.7±7.1                  |
| Total RF delivery time, min       | 43.9±18.3               | 42.2±17.9                |

CPVI, circumferential pulmonary vein isolation; ATA, atrial tachyarrhythmia; CV, cardioversion; PV, pulmonary vein; CTI, cavotricuspid isthmus; LVA, low-voltage area, RF, radiofrequency.

**eTable 4. Procedural characteristics (per-protocol set)**

| <b>Characteristics</b>            | <b>CPVI plus, n=205</b> | <b>CPVI alone, n=200</b> |
|-----------------------------------|-------------------------|--------------------------|
| ATA at baseline, n (%)            | 33 (16.1)               | 31 (15.1)                |
| AF termination during CPVI, n (%) | 66 (32.2)               | 52 (25.4)                |
| CV after CPVI, n (%)              | 12 (5.9)                | 2 (1.0)                  |
| Non-PV triggers, n (%)            | 17 (8.5)                | 20 (9.8)                 |
| Concomitant arrhythmia, n (%)     | 2 (1.0)                 | 5 (2.5)                  |
| CTI ablation, n (%)               | 24 (11.7)               | 20 (10.0)                |
| LVA, n (%)                        | 84 (41.0)               | 88 (44.0)                |
| LVA burden 1-10%, n (%)           | 64 (76.2)               | 74 (84.1)                |
| Area, cm <sup>2</sup>             | 3.9±2.5                 | 3.63±2.6                 |
| LVA burden 11-20%, n (%)          | 15 (17.9)               | 8 (9.1)                  |
| Area, cm <sup>2</sup>             | 13.2±1.8                | 13.7±3.5                 |
| LVA burden >20%, n (%)            | 5 (6.0)                 | 6 (6.8)                  |
| Area, cm <sup>2</sup>             | 29.5±9.7                | 40.6±9.5                 |
| Total procedure time, min         | 142.1±39.3              | 139.1±42.8               |
| Begin-CPVI completed, min         | 108.5±31.6              | 106.4±28.9               |
| CPVI completed-end, min           | 33.6±19.3               | 32.6±28.2                |
| Total fluoroscopic time, min      | 9.3±5.4                 | 9.7±7.1                  |
| Total RF delivery time, min       | 43.8±18.3               | 41.9±18.1                |

CPVI, circumferential pulmonary vein isolation; ATA, atrial tachyarrhythmia; AF, atrial fibrillation; CV, cardioversion; PV, pulmonary vein; CTI, cavotricuspid isthmus; LVA, low voltage area; RF, radiofrequency.

**eTable 5. Baseline characteristics of the four subgroups (modified ITT)**

| Characteristics                              | +LVA (CPVI plus), n=86 | -LVA (CPVI plus), n=123 | -LVA (CPVI only), n=117 | +LVA (CPVI only), n=88 |
|----------------------------------------------|------------------------|-------------------------|-------------------------|------------------------|
| Male, n (%)                                  | 37 (43.0)              | 70 (56.9)               | 70 (59.8)               | 33 (37.5)              |
| Age, years                                   | 71.1±4.0               | 69.9±4.6                | 70.3±4.0                | 71.1±4.4               |
| AF history, months                           | 24.0 (7.0, 48.0)       | 24.0 (4.0, 49.0)        | 12.0 (4.0, 48.0)        | 16.5 (5.5, 42.5)       |
| BMI, kg/m <sup>2</sup>                       | 23.9±4.4               | 24.5±2.8                | 24.7±3.0                | 24.5±2.9               |
| <25, n (%)                                   | 58 (70.7)              | 65 (57.0)               | 69 (59.5)               | 53 (61.6)              |
| ≥25, n (%)                                   | 24 (29.3)              | 49 (43.0)               | 47 (40.5)               | 33 (38.4)              |
| Comorbidities, n (%)                         |                        |                         |                         |                        |
| Hypertension                                 | 59 (68.6)              | 64 (52.0)               | 77 (65.8)               | 55 (62.5)              |
| Diabetes                                     | 16 (18.6)              | 15 (12.2)               | 19 (16.2)               | 19 (21.6)              |
| CAD                                          | 26 (30.2)              | 24 (19.5)               | 24 (20.5)               | 22 (25.0)              |
| Stroke or TIA                                | 4 (4.7)                | 12 (9.8)                | 12 (10.3)               | 8 (9.1)                |
| Congestive heart failure                     | 1 (1.2)                | 1 (0.81)                | 1 (0.85)                | 0 (0.0)                |
| COPD                                         | 3 (3.5)                | 1 (0.8)                 | 2 (1.7)                 | 1 (1.1)                |
| OSAS                                         | 0 (0.0)                | 0 (0.0)                 | 2 (1.6)                 | 1 (0.85)               |
| CHA <sub>2</sub> DS <sub>2</sub> -VASc score | 2.4±1.0                | 2.1±1.0                 | 2.3±1.0                 | 2.5±1.0                |
| 1, n (%)                                     | 16 (18.6)              | 36 (29.3)               | 28 (23.9)               | 18 (20.5)              |
| 2, n (%)                                     | 28 (32.6)              | 50 (40.7)               | 41 (35.0)               | 24 (27.3)              |
| 3, n (%)                                     | 30 (34.9)              | 27 (22.0)               | 31 (26.5)               | 34 (38.6)              |
| >3, n (%)                                    | 12 (14.0)              | 10 (8.1)                | 17 (14.5)               | 12 (13.6)              |
| LAD, mm                                      | 39.3±5.5               | 38.4±5.4                | 38.3±5.2                | 39.4±5.3               |
| LVEF, %                                      | 62.3±6.0               | 62.5±4.7                | 62.8±6.1                | 61.9±4.3               |

+LVA (CPVI plus), patients with LVA who received substrate modification; (2) +LVA (CPVI alone); patients with LVA who received CPVI alone; (3) -LVA (CPVI plus), patients without LVA who received CPVI in the “CPVI plus” group; (4). -LVA (CPVI alone), patients without LVA in the “CPVI alone” group. CPVI, circumferential pulmonary vein isolation; AF, atrial fibrillation; BMI, body mass index; CAD, coronary artery disease; TIA, transient ischemic attack; COPD, chronic obstructive pulmonary disease; OSAS, obstructive sleep apnea syndrome; LAD, left atrial diameter; LVEF, left ventricular ejection fraction.

**eTable 6. Procedural characteristics of four subgroups (modified ITT)**

| Characteristics                   | +LVA (CPVI plus), n=86 | -LVA (CPVI plus), n=123 | -LVA (CPVI only), n=117 | +LVA (CPVI only), n=88 |
|-----------------------------------|------------------------|-------------------------|-------------------------|------------------------|
| ATA at baseline, n (%)            | 14 (16.3)              | 19 (15.5)               | 18 (15.4)               | 15 (17.1)              |
| AF termination during CPVI, n (%) | 21 (24.4)              | 46 (37.4)               | 33 (28.2)               | 21 (23.9)              |
| CV after CPVI, n (%)              | 8 (9.3)                | 5 (4.1)                 | 2 (1.7)                 | 0 (0.0)                |
| Non-PV triggers, n (%)            | 6 (7.1)                | 11 (8.9)                | 14 (12.0)               | 6 (6.8)                |
| Concomitant arrhythmia, n (%)     | 1 (1.2)                | 0 (0.00)                | 0 (0.00)                | 2 (2.3)                |
| CTI ablation, n (%)               | 12 (14.0)              | 12 (9.8)                | 13 (11.1)               | 7 (8.0)                |
| LVA, n (%)                        | 86 (100.0)             | 0 (0.00)                | 0 (0.00)                | 88 (100.0)             |
| LVA burden 1-10%, n (%)           | 65 (75.6)              | 0 (0.00)                | 0 (0.00)                | 74 (84.1)              |
| Area, cm <sup>2</sup>             | 3.93±2.4               | 0 (0.00)                | 0 (0.00)                | 3.6±2.6                |
| LVA burden 11-20%, n (%)          | 15 (17.4)              | 0 (0.00)                | 0 (0.00)                | 8 (9.1)                |
| Area, cm <sup>2</sup>             | 13.2±1.8               | 0 (0.00)                | 0 (0.00)                | 13.6±3.5               |
| LVA burden >20%, n (%)            | 6 (7.0)                | 0 (0.00)                | 0 (0.00)                | 6 (6.8)                |
| Area, cm <sup>2</sup>             | 27.9±9.5               | 0 (0.00)                | 0 (0.00)                | 40.6±9.5               |
| Total procedure time, min         | 147.7±45.0             | 138.7±34.2              | 140.6±37.6              | 137.9±48.4             |
| Begin-CPVI completed, min         | 108.1±33.7             | 109.5±30.0              | 108.4±28.6              | 104.2±27.2             |
| CPVI completed-end, min           | 39.6±22.3              | 29.2±15.2               | 32.3±21.3               | 33.6±35.1              |
| Total fluoroscopic time, min      | 9.6±6.2                | 9.0±4.7                 | 10.2±6.1                | 9.1±8.2                |
| Total RF delivery time, min       | 47.4±19.8              | 41.3±16.7               | 42.9±9.1                | 41.2±16.3              |

+LVA (CPVI plus), patients with LVA who received substrate modification; (2) +LVA (CPVI alone); patients with LVA who received CPVI alone; (3) -LVA (CPVI plus), patients without LVA who received CPVI in the "CPVI plus" group; (4) -LVA (CPVI alone), patients without LVA in the "CPVI alone" group. LVA, low voltage area; ATA, atrial tachyarrhythmia; AF, atrial fibrillation; CPVI, circumferential pulmonary vein isolation; CV, cardioversion; PV, pulmonary vein; CTI, cavotricuspid isthmus; RF, radiofrequency.

**eTable 7. Baseline characteristics of the study population by LVA and treatment (modified intention to treat)**

| Characteristics                              | Subgroup A, n=86 | Subgroup B, n=88 | Subgroup C, n=240 |
|----------------------------------------------|------------------|------------------|-------------------|
| Male, n (%)                                  | 37 (43.0)        | 33 (37.5)        | 140 (58.3)        |
| Age, years                                   | 71.1±4.0         | 71.1±4.4         | 70.1±4.3          |
| AF history, months                           | 24.0 (7.0, 48.0) | 16.5 (5.5, 42.5) | 14.0 (4.0, 48.0)  |
| BMI, kg/m <sup>2</sup>                       | 23.9±4.4         | 24.5±2.9         | 24.6±2.9          |
| <25, n (%)                                   | 58 (70.7)        | 53 (61.6)        | 134 (58.3)        |
| ≥25, n (%)                                   | 24 (29.3)        | 33 (38.4)        | 96 (41.7)         |
| Comorbidities, n (%)                         |                  |                  |                   |
| Hypertension                                 | 59 (68.6)        | 55 (62.5)        | 141 (58.8)        |
| Diabetes                                     | 16 (18.6)        | 19 (21.6)        | 34 (14.2)         |
| CAD                                          | 26 (30.2)        | 22 (25.0)        | 48 (20.0)         |
| Stroke or TIA                                | 4 (4.7)          | 8 (9.1)          | 24 (10.0)         |
| Congestive heart failure                     | 1 (1.2)          | 0 (0.0)          | 2 (0.8)           |
| COPD                                         | 3 (3.5)          | 1 (1.1)          | 3 (1.3)           |
| OSAS                                         | 0 (0.0)          | 0 (0.0)          | 3 (1.3)           |
| CHA <sub>2</sub> DS <sub>2</sub> -VASc score | 2.4±1.0          | 2.5±1.0          | 2.2±1.0           |
| 1, n (%)                                     | 16 (18.6)        | 18 (20.5)        | 64 (26.7)         |
| 2, n (%)                                     | 28 (32.6)        | 24 (27.3)        | 91 (37.9)         |
| 3, n (%)                                     | 30 (34.9)        | 34 (38.6)        | 58 (24.2)         |
| >3, n (%)                                    | 12 (14.0)        | 12 (13.6)        | 27 (11.3)         |
| LAD, mm                                      | 39.3±5.5         | 39.4±5.3         | 38.3±5.3          |
| LVEF, %                                      | 62.3±6.0         | 61.9±4.3         | 62.7±5.5          |

Subgroup A, patients with LVA who received “CPVI plus”; Subgroup B, patients with LVA who received “CPVI alone”; Subgroup C; all the enrolled patients without LVA of both groups; LVA, low voltage area; CPVI, circumferential pulmonary vein isolation; AF, atrial fibrillation; BMI, body mass index; CAD, coronary artery disease; TIA, transient ischemic attack; COPD, chronic obstructive pulmonary disease; OSAS, obstructive sleep apnea syndrome; LAD, left atrial diameter; LVEF, left ventricular ejection fraction.

**eTable 8. Procedural characteristics of the study population by LVA and treatment (modified intention to treat)**

| Characteristics                   | Subgroup A, n=86 | Subgroup B, n=88 | Subgroup C, n=240 |
|-----------------------------------|------------------|------------------|-------------------|
| ATA at baseline, n (%)            | 14 (16.3)        | 15 (17.1)        | 37 (15.4)         |
| AF termination during CPVI, n (%) | 21 (24.4)        | 21 (23.9)        | 79 (32.9)         |
| CV after CPVI, n (%)              | 8 (9.3)          | 0 (0.0)          | 7 (2.9)           |
| Non-PV triggers, n (%)            | 6 (7.1)          | 6 (6.8)          | 25 (10.7)         |
| Concomitant arrhythmia, n (%)     | 1 (1.2)          | 2 (2.3)          | 4 (1.7)           |
| CTI ablation, n (%)               | 12 (14.0)        | 7 (8.0)          | 25 (10.4)         |
| LVA, n (%)                        | 86 (100.0)       | 88 (100.0)       | 0 (0.0)           |
| LVA burden 1-10%, n (%)           | 65 (75.6)        | 74 (84.1)        | 0 (0.0)           |
| Area, cm <sup>2</sup>             | 3.93±2.4         | 3.6±2.6          | 0±0               |
| LVA burden 11-20%, n (%)          | 15 (17.4)        | 8 (9.1)          | 0 (0.0)           |
| Area, cm <sup>2</sup>             | 13.2±1.8         | 13.6±3.5         | 0±0               |
| LVA burden >20%, n (%)            | 6 (7.0)          | 6 (6.8)          | 0 (0.0)           |
| Area, cm <sup>2</sup>             | 27.9±9.5         | 40.6±9.5         | 0±0               |
| Total procedure time, min         | 147.7±45.0       | 137.9±48.4       | 139.6±35.9        |
| Begin-CPVI completed, min         | 108.1±33.7       | 104.2±27.2       | 108.9±29.2        |
| CPVI completed-end, min           | 39.6±22.3        | 33.6±35.1        | 30.7±18.4         |
| Total fluoroscopic time, min      | 9.6±6.2          | 9.1±8.2          | 9.6±5.4           |
| Total RF delivery time, min       | 47.4±19.8        | 41.2±16.3        | 42.1±17.9         |

Subgroup A, patients with LVA who received "CPVI plus"; Subgroup B, patients with LVA who received "CPVI alone"; Subgroup C; all the enrolled patients without LVA of both groups; LVA, low voltage area; ATA, atrial tachyarrhythmia; AF, atrial fibrillation; CPVI, circumferential pulmonary vein isolation; CV, cardioversion; PV, pulmonary vein; CTI, cavotricuspid isthmus; RF, radiofrequency.

**eTable 9. Baseline characteristics of the study population by LVA and treatment (per-protocol set)**

| Characteristics                              | Subgroup A, n=84 | Subgroup B, n=88 | Subgroup C, n=233 |
|----------------------------------------------|------------------|------------------|-------------------|
| Male, n (%)                                  | 37 (44.1)        | 33 (37.5)        | 137 (58.8)        |
| Age, years                                   | 71.0±4.1         | 71.1±4.4         | 70.2±3.8          |
| AF history, months                           | 24.0 (6.5, 48.0) | 16.5 (5.5, 42.5) | 14.0 (4.0, 48.0)  |
| BMI, kg/m <sup>2</sup>                       | 23.9±4.5         | 24.5±2.9         | 24.6±2.9          |
| <25, n (%)                                   | 56 (70.0)        | 53 (61.6)        | 129 (57.9)        |
| ≥25, n (%)                                   | 24 (30.0)        | 33 (38.4)        | 94 (42.6)         |
| Comorbidities, n (%)                         |                  |                  |                   |
| Hypertension                                 | 57 (67.9)        | 55 (62.5)        | 139 (59.7)        |
| Diabetes                                     | 16 (19.1)        | 19 (21.6)        | 34 (14.6)         |
| CAD                                          | 26 (31.0)        | 22 (25.0)        | 47 (20.2)         |
| Stroke or TIA                                | 4 (4.8)          | 8 (9.1)          | 24 (10.3)         |
| Congestive heart failure                     | 1 (1.2)          | 0 (0.0)          | 2 (0.9)           |
| COPD                                         | 3 (3.6)          | 1 (1.1)          | 2 (0.9)           |
| OSAS                                         | 0 (0.0)          | 0 (0.0)          | 3 (1.3)           |
| CHA <sub>2</sub> DS <sub>2</sub> -VASc score | 2.4±1.0          | 2.5±1.0          | 2.2±1.0           |
| 1, n (%)                                     | 16 (19.1)        | 18 (20.5)        | 60 (25.8)         |
| 2, n (%)                                     | 28 (33.3)        | 24 (27.3)        | 90 (38.6)         |
| 3, n (%)                                     | 28 (33.3)        | 34 (38.6)        | 56 (24.0)         |
| >3, n (%)                                    | 12 (14.3)        | 12 (13.6)        | 27 (11.6)         |
| LAD, mm                                      | 39.4±5.4         | 39.4±5.3         | 38.27±5.3         |
| LVEF, %                                      | 62.3±6.1         | 61.9±4.3         | 62.7±5.5          |

Subgroup A, patients with LVA who received “CPVI plus”; Subgroup B, patients with LVA who received “CPVI alone”; Subgroup C; all the enrolled patients without LVA of both groups; CPVI, circumferential pulmonary vein isolation; AF, atrial fibrillation; BMI, body mass index; CAD, coronary artery disease; TIA, transient ischemic attack; COPD, chronic obstructive pulmonary disease; OSAS, obstructive sleep apnea syndrome; LAD, left atrial diameter; LVEF, left ventricular ejection fraction.

**eTable 10. Procedural characteristics of the study population by LVA and treatment (per-protocol set)**

| Characteristics                   | Subgroup A, n=84 | Subgroup B, n=88 | Subgroup C, n=233 |
|-----------------------------------|------------------|------------------|-------------------|
| ATA at baseline, n (%)            | 14 (16.7)        | 15 (17.1)        | 35 (15.0)         |
| AF termination during CPVI, n (%) | 20 (23.8)        | 21 (23.9)        | 77 (33.1)         |
| CV after CPVI, n (%)              | 7 (8.3)          | 0 (0.0)          | 7 (3.0)           |
| Non-PV triggers, n (%)            | 6 (7.1)          | 5 (5.7)          | 25 (10.7)         |
| Concomitant arrhythmia, n (%)     | 1 (1.2)          | 2 (2.3)          | 3 (1.3)           |
| CTI ablation, n (%)               | 12 (13.4)        | 7 (8.0)          | 25 (10.4)         |
| LVA, n (%)                        | 84 (100.0)       | 88 (100.0)       | 0 (0.0)           |
| LVA burden 1-10%, n (%)           | 64 (76.2)        | 74 (84.1)        | 0 (0.0)           |
| Area, cm <sup>2</sup>             | 3.9±2.5          | 3.6±2.6          | 0±0               |
| LVA burden 11-20%, n (%)          | 15 (17.9)        | 8 (9.1)          | 0 (0.0)           |
| Area, cm <sup>2</sup>             | 13.2±1.8         | 13.7±3.5         | 0±0               |
| LVA burden >20%, n (%)            | 5 (6.0)          | 6 (6.8)          | 0 (0.0)           |
| Area, cm <sup>2</sup>             | 29.5±9.7         | 40.6±9.5         | 0±0               |
| Total procedure time, min         | 146.9±45.0       | 137.9±48.4       | 139.3±36.2        |
| Begin-CPVI completed, min         | 107.3±33.6       | 104.2±27.2       | 108.8±29.4        |
| CPVI completed-end, min           | 39.5±22.5        | 33.6±35.1        | 30.6±18.4         |
| Total fluoroscopic time, min      | 9.7±6.2          | 9.1±8.2          | 9.6±5.5           |
| Total RF delivery time, min       | 47.1±19.9        | 41.2±16.3        | 42.0±18.1         |

Subgroup A, patients with LVA who received “CPVI plus”; Subgroup B, patients with LVA who received “CPVI alone”; Subgroup C; all the enrolled patients without LVA of both groups; LVA, low voltage area; ATA, atrial tachyarrhythmia; AF, atrial fibrillation; CPVI, circumferential pulmonary vein isolation; CV, cardioversion; PV, pulmonary vein; CTI, cavotricuspid isthmus; RF, radiofrequency.



**eTable 11. Peri-procedural safety data**

| <b>Adverse events</b>           | <b>CPVI plus, n=209</b> | <b>CPVI alone, n=205</b> |
|---------------------------------|-------------------------|--------------------------|
| VF during peri-procedure, n     | 0                       | 1                        |
| Vascular access complication, n | 1                       | 1                        |
| Hemoptysis, n                   | 1                       | 1                        |
| Total, n                        | 2                       | 3                        |

CPVI, circumferential pulmonary vein isolation; VF, ventricular fibrillation.

**eTable 12. Adverse events during follow-up**

| <b>Adverse events</b> | <b>CPVI plus, n=209</b> | <b>CPVI alone, n=205</b> |
|-----------------------|-------------------------|--------------------------|
| Death, n              | 1                       | 0                        |
| Cancer, n             | 1                       | 2                        |
| Total, n              | 2                       | 2                        |

CPVI, circumferential pulmonary vein isolation.

**eTable 13. Baseline characteristics of the study population by sex**

| <b>Characteristics</b>                       | <b>Male, n=210</b> | <b>Female, n=204</b> |
|----------------------------------------------|--------------------|----------------------|
| Age, years                                   | 70.6±3.9           | 70.5±4.7             |
| AF history, months                           | 12 (3.0, 36)       | 24 (6.0, 48)         |
| BMI, kg/m <sup>2</sup>                       | 24.4±3.1           | 24.7±3.2             |
| <25, n (%)                                   | 125 (62.5)         | 120 (60.6)           |
| ≥25, n (%)                                   | 75 (37.5)          | 78 (39.4)            |
| Comorbidities, n (%)                         |                    |                      |
| Hypertension                                 | 128 (61.0)         | 127 (62.3)           |
| Diabetes                                     | 37 (17.6)          | 32 (15.7)            |
| CAD                                          | 49 (23.3)          | 47 (23.0)            |
| Stroke or TIA                                | 25 (11.9)          | 11 (5.4)             |
| Congestive heart failure                     | 2 (1.0)            | 1 (0.5)              |
| COPD                                         | 6 (2.9)            | 1 (0.5)              |
| OSAS                                         | 1 (0.5)            | 2 (1.0)              |
| CHA <sub>2</sub> DS <sub>2</sub> -VASc score | 2.0±1.0            | 2.7±1.0              |
| 1, n (%)                                     | 77 (36.7)          | 21 (10.3)            |
| 2, n (%)                                     | 80 (38.1)          | 63 (30.9)            |
| 3, n (%)                                     | 36 (17.1)          | 86 (42.2)            |
| >3, n (%)                                    | 17 (8.1)           | 34 (16.7)            |
| LAD, mm                                      | 39.0±5.5           | 38.5±5.2             |
| LVEF, %                                      | 62.3±5.7           | 62.6±4.9             |
| LVA prevalence, n (%)                        | 63 (30.0)          | 104 (50.9)           |
| LVA burden, %                                | 4.6±4.3            | 9.0±7.8              |

CPVI, circumferential pulmonary vein isolation; AF, atrial fibrillation; BMI, body mass index; CAD, coronary artery disease; TIA, transient ischemic attack; COPD, chronic obstructive pulmonary disease; OSAS, obstructive sleep apnea syndrome; LAD, left atrial diameter; LVEF, left ventricular ejection fraction; LVA, low voltage area.

**eTable 14. Hazard ratio for primary endpoint after adjustment of study centers, sex, and BMI**

|                      | CPVI alone    | mITT             |         | PPS              |         |
|----------------------|---------------|------------------|---------|------------------|---------|
|                      |               | CPVI plus        | P value | CPVI plus        | P value |
| HR (95% CI), Model 1 | 1 (reference) | 0.58 (0.37-0.92) | 0.021   | 0.56 (0.35-0.89) | 0.014   |
| HR (95% CI), Model 2 | 1 (reference) | 0.61 (0.39-0.95) | 0.030   | 0.58 (0.37-0.92) | 0.020   |
| HR (95% CI), Model 3 | 1 (reference) | 0.59 (0.37-0.94) | 0.025   | 0.56 (0.35-0.90) | 0.016   |
| HR (95% CI), Model 4 | 1 (reference) | 0.57 (0.36-0.92) | 0.020   | 0.55 (0.34-0.88) | 0.013   |

Model 1: adjusted for study centers;

Model 2: adjusted for sex;

Model 3: adjusted for BMI;

Model 4: adjusted for study centers, sex and BMI;

mITT, modified intention to treat; PPS, per-protocol analysis, BMI, body mass index; CPVI, circumferential pulmonary vein isolation.

**eFigure 1. Sample images of LVA distribution and the corresponding ablation strategies**

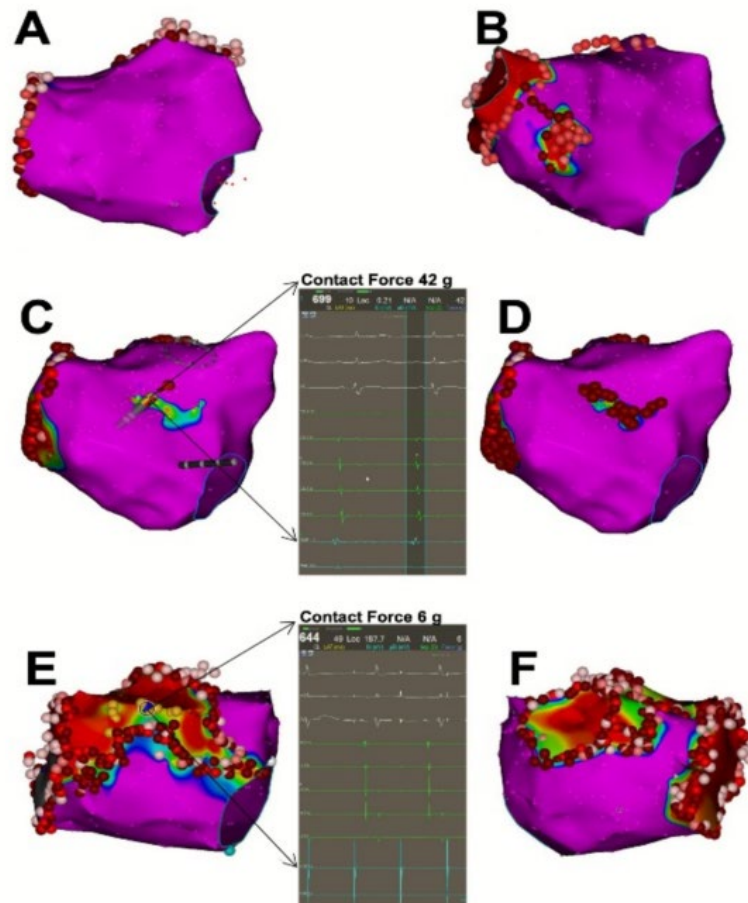

**A:** Patients without LVA after CPVI and no additional ablation was needed; **B:** LVA homogenization was performed in the left anterior atrial wall with a short lesion line extended to the right-side PV line; **C and D:** Isolated small patches of LVAs in left anterior atrial body and exterior RIPV antrum, localized homogenizations were performed accordingly; **E and F,** Extensive LVA was mapped in the anterior wall and posterior region of the left atrium. Scar isolation was conducted by placing the lesions encircling the LVA areas. Note that there was an apparent dissociation between the high-voltage pacing within the box area (blue dot) and the left atrial activation. CPVI, circumferential pulmonary vein isolation; LVA, low-voltage area; RIPV, right inferior pulmonary vein.

**eFigure 2. Kaplan-Meier curve of the freedom from ATA after single procedure by specificity analysis of clinical-detected event-based finding between CPVI plus and CPVI alone groups by modified intention-to-treat analysis**

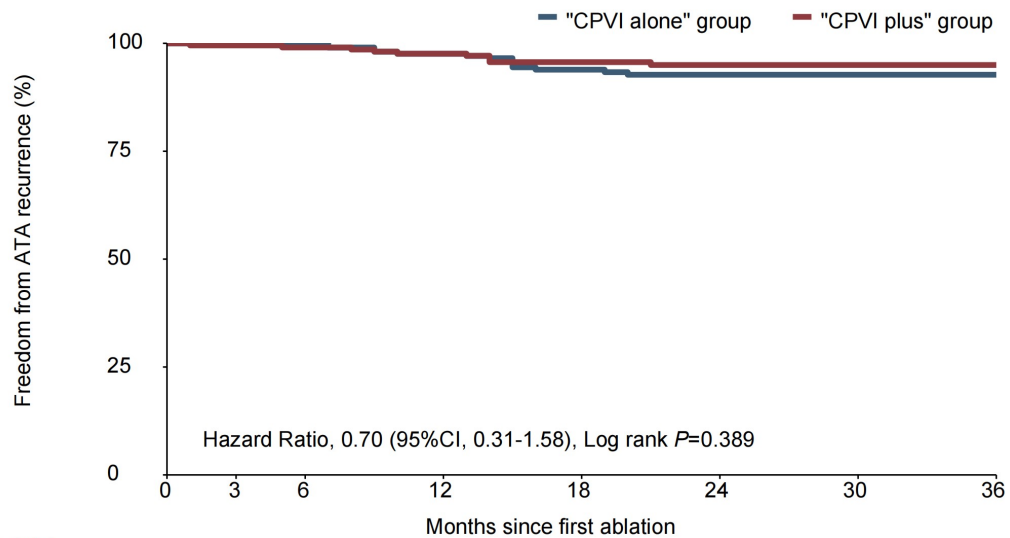

Number at risk

|                    |     |     |     |     |     |     |    |    |
|--------------------|-----|-----|-----|-----|-----|-----|----|----|
| "CPVI alone" group | 205 | 205 | 205 | 200 | 163 | 120 | 65 | 30 |
| "CPVI plus" group  | 209 | 208 | 207 | 206 | 164 | 120 | 77 | 33 |

This graph shows freedom from recurrent ATA following the post-blanking period after a single procedure between CPVI plus and CPVI alone groups by specificity analysis of clinical-detected event-based finding between two groups. ATA recurrence referred to the situation where patients experienced symptoms of palpitation and had documented AF recurrence on an ECG during unscheduled clinical visits. The recurrent events in the proposal-scheduled follow-up were neglected. There was no significant difference in ATA recurrence between the two groups (Hazard Ratio 0.70 [95% CI, 0.31-1.58], Log rank  $P=0.389$ ).

**eFigure 3. Kaplan-Meier curve of the freedom from ATA after single procedure among three subgroups by mITT**

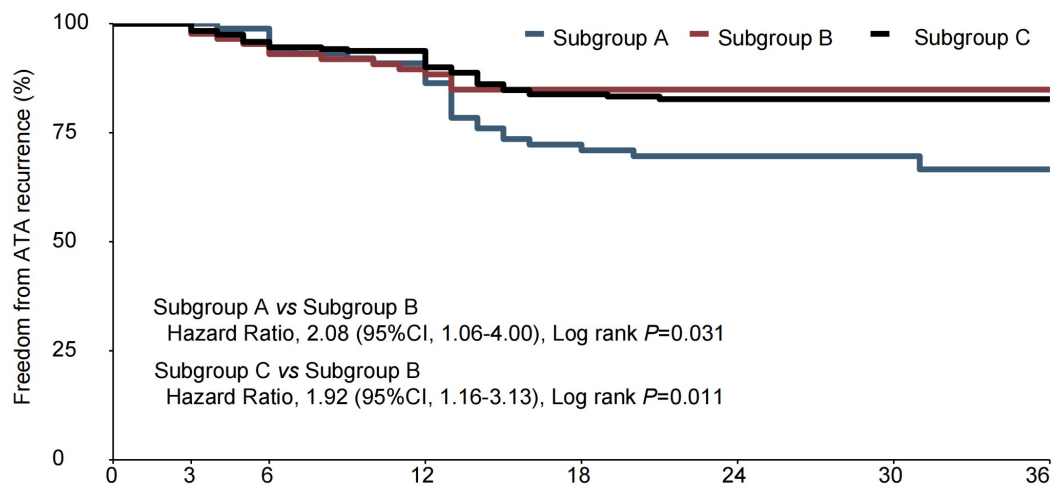

| Number at risk | Months since first ablation |     |     |     |     |     |    |    |
|----------------|-----------------------------|-----|-----|-----|-----|-----|----|----|
|                | 0                           | 3   | 6   | 12  | 18  | 24  | 30 | 36 |
| Subgroup A     | 88                          | 88  | 87  | 80  | 55  | 41  | 23 | 10 |
| Subgroup B     | 86                          | 86  | 82  | 77  | 59  | 44  | 27 | 10 |
| Subgroup C     | 240                         | 240 | 230 | 225 | 165 | 112 | 64 | 30 |

The graph demonstrates that patients with LVA who received CPVI alone (Subgroup B) had significantly higher recurrence rate than those without LVA (Subgroup C,  $P=0.011$ ), and those with LVA receiving modification (Subgroup A,  $P=0.031$ ), respectively. Note that the curves begin to diverge at 1 year, coinciding with the 12 month 7-day ambulatory monitoring. ATA, atrial tachyarrhythmia; Based on the presence of LVA and the 2 ablation strategies described in protocol section (Supplemental materials, page 18), all patients were divided into three subgroups: Subgroup A, patients with LVA who received “CPVI plus”; Subgroup B, patients with LVA who received “CPVI alone”; Subgroup C, all the enrolled patients without LVA of both groups; CPVI, circumferential pulmonary vein isolation; HR, hazard ratio; CI, confidence interval.

**eFigure 4. Primary endpoint subgroup by mITT analysis**

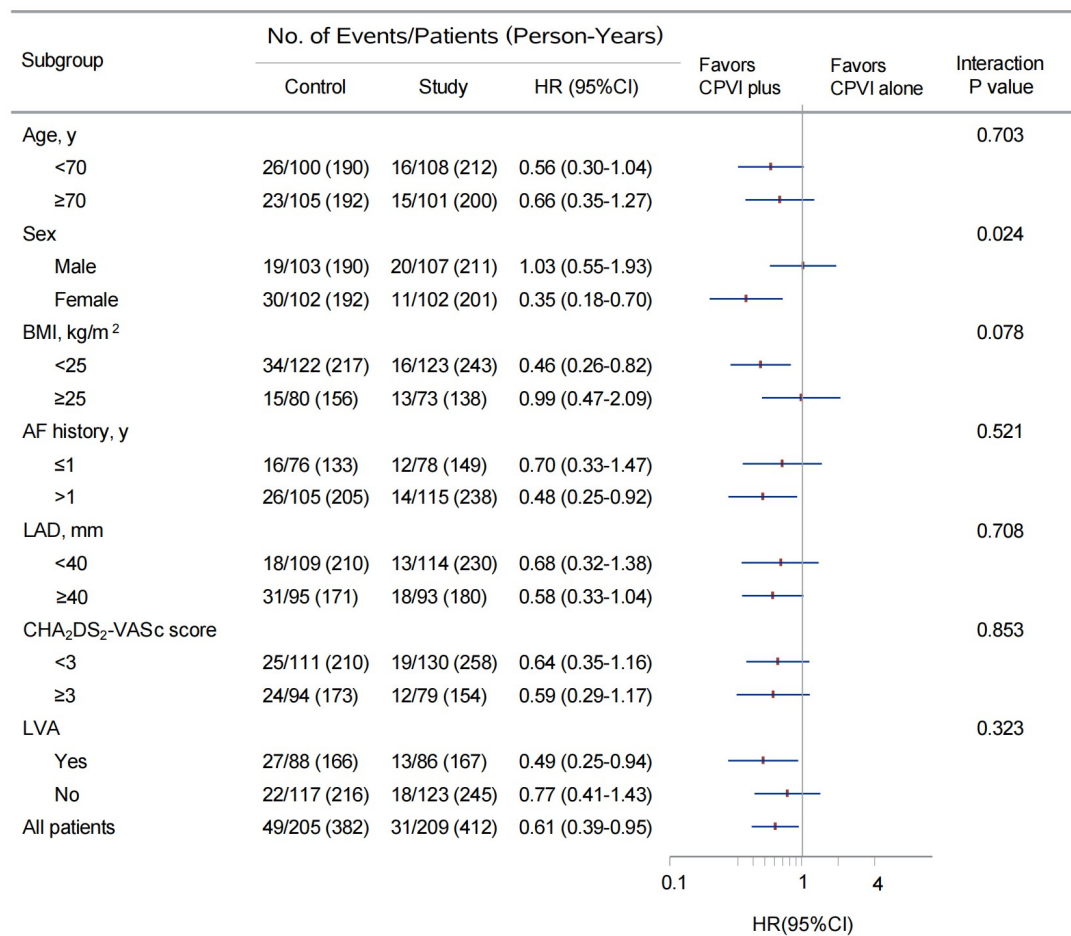

Primary endpoint subgroup analyses. Squares represent point estimates calculated by Cox regression analysis with lines representing the 95% CI. Sensitivity analysis is shown in eTable 14. CI, confidence interval; CPVI, circumferential pulmonary vein isolation; BMI, body mass index; AF, atrial fibrillation; LAD, left atrial diameter; CHA<sub>2</sub>DS<sub>2</sub>-VASc score, congestive heart failure, hypertension, age ≥75 years (doubled), diabetes, stroke/transient ischemic attack/thromboembolism (doubled), vascular disease (prior myocardial infarction, peripheral artery disease, or aortic plaque), age 65-75 years, sex category (female); LVA, low-voltage area.



**eFigure 5. Kaplan-Meier estimates of the freedom from ATA after single procedure between CPVI plus and CPVI alone groups by intention-to-treatment**

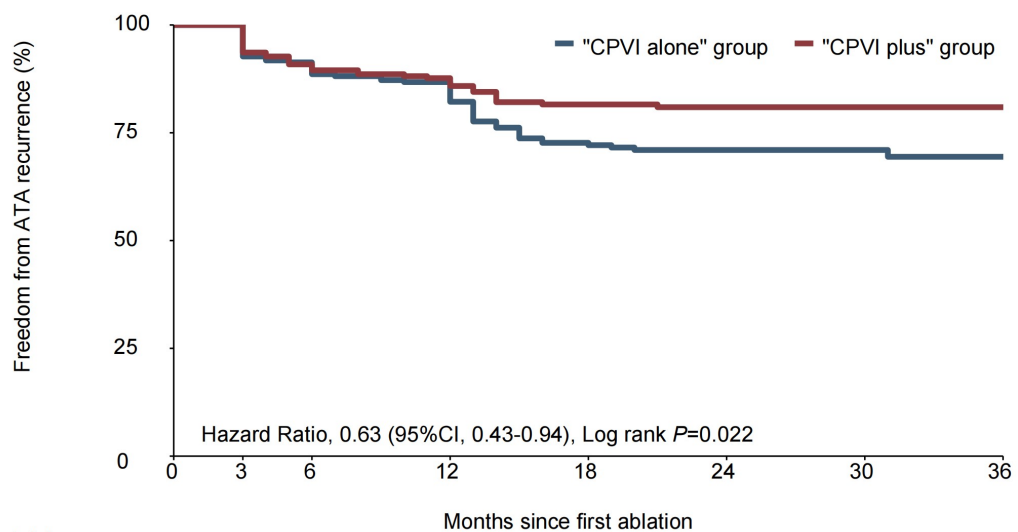

| Number at risk     | Months since first ablation |     |     |     |     |     |    |    |
|--------------------|-----------------------------|-----|-----|-----|-----|-----|----|----|
|                    | 0                           | 3   | 6   | 12  | 18  | 24  | 30 | 36 |
| "CPVI alone" group | 219                         | 219 | 200 | 190 | 133 | 92  | 49 | 21 |
| "CPVI plus" group  | 219                         | 219 | 199 | 192 | 146 | 105 | 65 | 29 |

This graph shows freedom from recurrent ATA following the post-blanking period after a single procedure between CPVI plus and CPVI alone groups by intention-to-treatment depend on “worst-case” analysis, which means all the patients who declined ablation (one case in study group) or lost to follow-up during the blanking period (9 cases in study group and 14 cases in control group) were assumed to have ATA recurrence at the first 3month follow-up. There is significant reduction in CPVI plus group compared with CPVI alone group (18.7% vs. 28.8%, HR 0.63, [95% CI, 0.43-0.94],  $P=0.022$ ). Note that the curves begin to diverge at 1 year, coinciding with the 12 month 7-day ambulatory monitoring. CPVI, circumferential pulmonary vein isolation; ATA, atrial tachyarrhythmia; HR, hazard ratio; CI, confidence interval.

**eFigure 6. Kaplan-Meier estimates of the freedom from ATA after single procedure between CPVI plus and CPVI alone groups by per-protocol analysis**

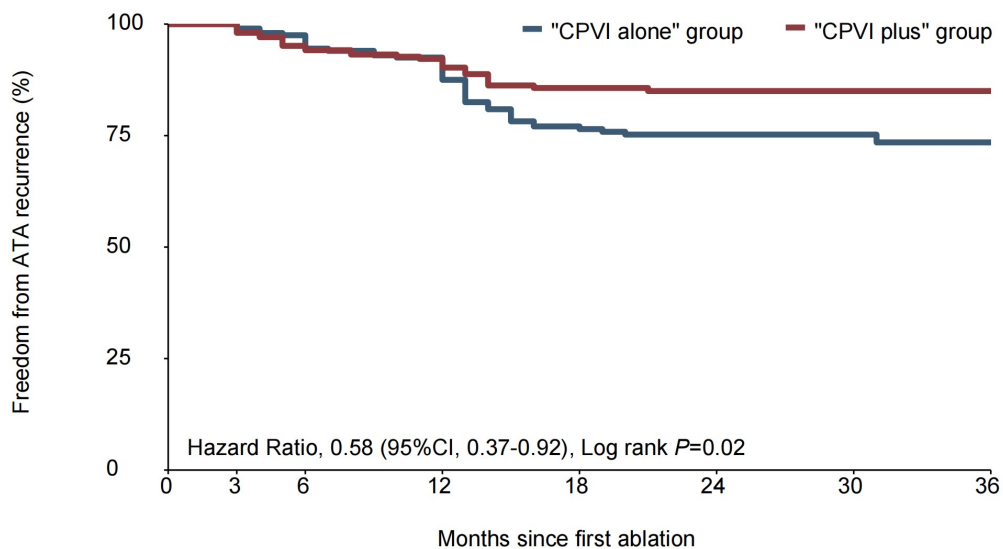

Number at risk

|                    | 0   | 3   | 6   | 12  | 18  | 24  | 30 | 36 |
|--------------------|-----|-----|-----|-----|-----|-----|----|----|
| "CPVI alone" group | 200 | 200 | 195 | 185 | 128 | 89  | 47 | 21 |
| "CPVI plus" group  | 205 | 205 | 195 | 189 | 143 | 102 | 64 | 28 |

This graph shows freedom from recurrent ATA following the post-blanking period after a single procedure. There is significant reduction in CPVI plus group compared with CPVI alone group ( $P=0.02$ ). Note that the curves begin to diverge at 1 year, coinciding with the 12 month 7-day ambulatory monitoring. CPVI, circumferential pulmonary vein isolation; ATA, atrial tachyarrhythmia; HR, hazard ratio; CI, confidence interval.

**eFigure 7. Kaplan-Meier curve of the freedom from ATA after single procedure among four subgroups by per-protocol analysis**

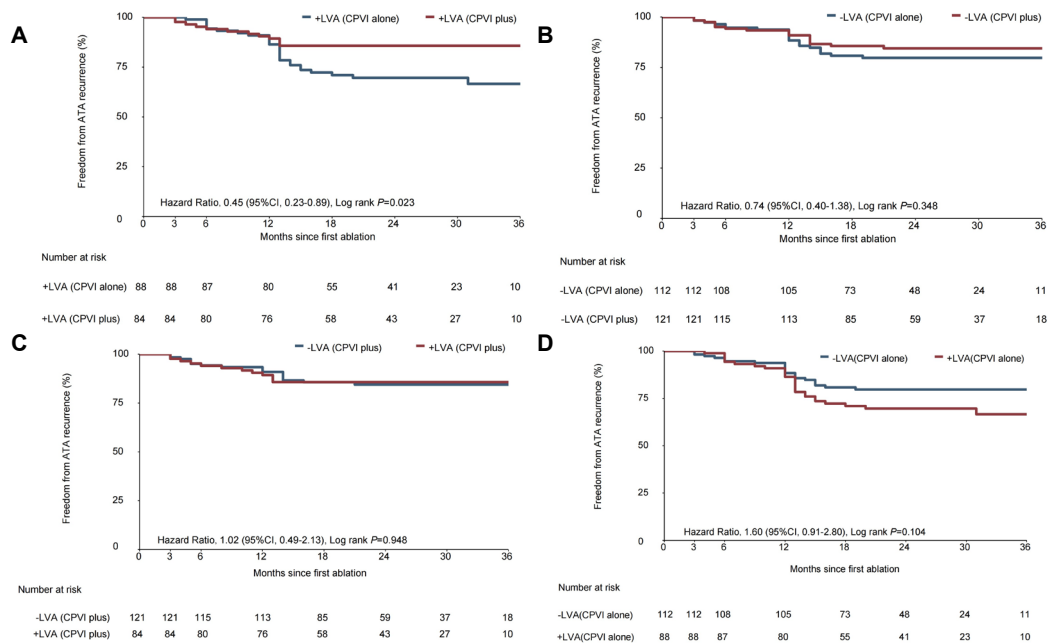

The graph demonstrates that patients with LVA who received CPVI plus had significantly higher recurrence rate than those with LVA who received CPVI alone (P=0.023). Based on randomization assignment and the existence of LVA, all patients were divided into four subgroups: (1) +LVA (CPVI plus), patients with LVA who received substrate modification; (2) +LVA (CPVI alone); patients with LVA who received CPVI alone; (3) -LVA (CPVI plus), patients without LVA who received CPVI in the “CPVI plus” group; (4) -LVA (CPVI alone), patients without LVA in the “CPVI alone” group. Patients with LVA who received modification in the study group had a significant reduction of ATA recurrence compared to those who did not in the control group (A). Note that the ascertainment of recurrent ATA episodes differed at 12 vs. 3 or 6 months. CPVI, circumferential pulmonary vein isolation; HR, hazard ratio; CI, confidence interval; - LVA = without low voltage area, + LVA = with low voltage area.

**eFigure 8. Kaplan-Meier curve of the freedom from ATA after single procedure among three subgroups by per-protocol analysis**

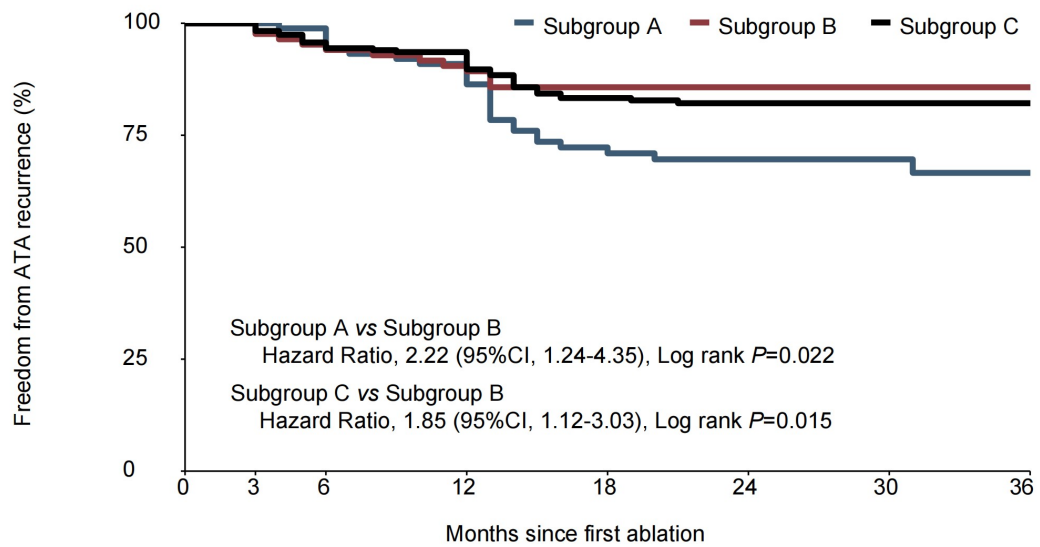

| Number at risk | 0   | 3   | 6   | 12  | 18  | 24  | 30 | 36 |
|----------------|-----|-----|-----|-----|-----|-----|----|----|
| Subgroup A     | 88  | 88  | 87  | 80  | 55  | 41  | 23 | 10 |
| Subgroup B     | 84  | 84  | 80  | 76  | 58  | 43  | 27 | 10 |
| Subgroup C     | 233 | 233 | 223 | 218 | 158 | 107 | 61 | 29 |

The graph demonstrates that patients with LVA who received CPVI alone (Subgroup B) had significantly higher recurrence rate than those without LVA (Subgroup C,  $P=0.015$ ), and those with LVA receiving modification (Subgroup A,  $P=0.022$ ), respectively. Note that the curves begin to diverge at 1 year, coinciding with the 12 month 7-day ambulatory monitoring. ATA, atrial tachyarrhythmia. Based on the presence of LVA and the 2 ablation strategies, all patients were divided into three subgroups: Subgroup A, patients with LVA who received “CPVI plus”; Subgroup B, patients with LVA who received “CPVI alone”; Subgroup C, all the enrolled patients without LVA of both groups; CPVI, circumferential pulmonary vein isolation; HR, hazard ratio; CI, confidence interval.

**eFigure 9. Primary endpoint subgroup by per-protocol analysis**

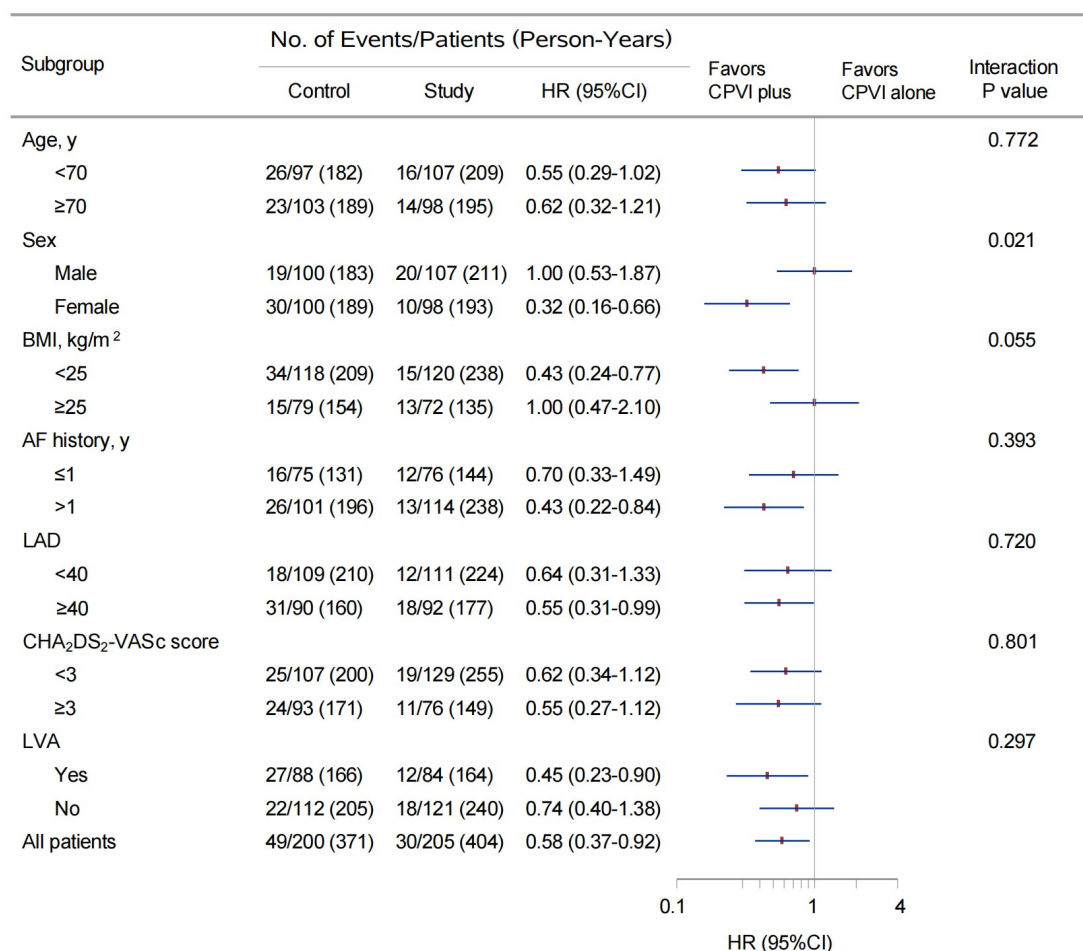

Squares represent point estimates calculated by Cox regression analysis with lines representing the 95% CI. Note that LVA ablation in female patients were more beneficial in “CPVI plus” group compared with “CPVI alone” group (P=0.021) according to subgroup interactions analyses. CI, confidence interval; CPVI, circumferential pulmonary vein isolation; BMI, body mass index; AF, atrial fibrillation; LAD, left atrial diameter; CHA<sub>2</sub>DS<sub>2</sub>-VASc score, congestive heart failure, hypertension, age≥75 years (doubled), diabetes, stroke/transient ischemic attack/thromboembolism (doubled), vascular disease (prior myocardial infarction, peripheral artery disease, or aortic plaque), age 65-75 years, sex category (female); LVA, Low-voltage area.
