# Supplementary material
Source: PubMed Central journal article supplement (PMC10308299)
Supplement: jamacardiol-e231749-s003.pdf [file jamacardiol-e231749-s003.pdf]

\*Indicates required information. Only first name, last name, and suffix will appear in PubMed.

| <b>*Group Name(s): STABLE-SR-III Investigators</b> |                   |                              |                  |                                                                                                    |                                          |                                                         |                                                                                            |
|----------------------------------------------------|-------------------|------------------------------|------------------|----------------------------------------------------------------------------------------------------|------------------------------------------|---------------------------------------------------------|--------------------------------------------------------------------------------------------|
| <b>*First Name and Middle Initial(s)</b>           | <b>*Last Name</b> | <b>*Suffix (eg, Jr, III)</b> | Academic Degrees | Institution                                                                                        | Location (city, state/province, country) | Role or Contribution, eg, chair, principal investigator | Group (if more than 1 Group listed in the byline) and/or Subgroup (eg, Steering Committee) |
| Minglong                                           | Chen              |                              | MD               | The First Affiliated Hospital of Nanjing Medical University                                        | Nanjing, Jiangsu, China                  | principal investigator                                  | Steering committee                                                                         |
| Bing                                               | Han               |                              | MD               | Xuzhou Central Hospital, the Affiliated Xuzhou Hospital of Medical College of Southeast University | Xuzhou, Jiangsu, China                   | investigator                                            | Steering committee                                                                         |
| Chenyang                                           | Jiang             |                              | MD               | Sir Run Run Shaw Hospital, affiliated with the Zhejiang University School of Medicine              | Hangzhou, Zhejiang, China                | investigator                                            | Steering committee                                                                         |
| Weizhu                                             | Ju                |                              | MD               | The First Affiliated Hospital of Nanjing Medical University                                        | Nanjing, Jiangsu, China                  | Enrollment of participants                              |                                                                                            |
| Gang                                               | Yang              |                              | MD               | The First Affiliated Hospital of Nanjing Medical University                                        | Nanjing, Jiangsu, China                  | Enrollment of participants                              |                                                                                            |
| Zidun                                              | Wang              |                              | MD               | The First Affiliated Hospital of Nanjing Medical University                                        | Nanjing, Jiangsu, China                  | Enrollment of participants                              |                                                                                            |
| Hao                                                | Yang              |                              | MD               | The First Affiliated Hospital of Wannan Medical College                                            | Wuhu, Anhui, China                       | Enrollment of participants                              |                                                                                            |
| Jinfeng                                            | Wang              |                              | MD               | The First Affiliated Hospital of Wannan Medical College                                            | Wuhu, Anhui, China                       | Enrollment of participants                              |                                                                                            |
| Ping                                               | Fang              |                              | MD               | The First Affiliated Hospital of Wannan Medical College                                            | Wuhu, Anhui, China                       | Enrollment of participants                              |                                                                                            |
| Zhirong                                            | Wang              |                              | MD               | The Affiliated Hospital of Xuzhou Medical University                                               | Xuzhou, Jiangsu, China                   | Enrollment of participants                              |                                                                                            |
| Chaoqun                                            | Zhang             |                              | MD               | The Affiliated Hospital of Xuzhou Medical University                                               | Xuzhou, Jiangsu, China                   | Enrollment of participants                              |                                                                                            |
| Fei                                                | Li                |                              | MD               | The Affiliated Hospital of Xuzhou Medical University                                               | Xuzhou, Jiangsu, China                   | Enrollment of participants                              |                                                                                            |
| Xiaoli                                             | Chen              |                              | MD               | The Second Affiliated Hospital of Nantong University                                               | Nantong, Jiangsu, China                  | Enrollment of participants                              |                                                                                            |

## Supplemental Online Content: Nonauthor Collaborators

\*Indicates required information. Only first name, last name, and suffix will appear in PubMed.

| *First Name and Middle Initial(s) | *Last Name | *Suffix (eg, Jr, III) | Academic Degrees | Institution                                                                                        | Location (city, state/province, country) | Role or Contribution, eg, chair, principal investigator | Group (if more than 1 Group listed in the byline) and/or Subgroup (eg, Steering Committee) |
|-----------------------------------|------------|-----------------------|------------------|----------------------------------------------------------------------------------------------------|------------------------------------------|---------------------------------------------------------|--------------------------------------------------------------------------------------------|
| Jianfei                           | Huang      |                       | MD               | The Second Affiliated Hospital of Nantong University                                               | Nantong, Jiangsu, China                  | Enrollment of participants                              |                                                                                            |
| Chenhui                           | Tai        |                       | MD               | The Second Affiliated Hospital of Nantong University                                               | Nantong, Jiangsu, China                  | Enrollment of participants                              |                                                                                            |
| Jie                               | Hao        |                       | MD               | The Second Hospital of Hebei Medical University                                                    | Shijiazhuang, Hebei, China               | Enrollment of participants                              |                                                                                            |
| Yihe                              | Chen       |                       | MD               | The First Affiliated Hospital of Wenzhou Medical University                                        | Wenzhou, Zhejiang, China                 | Enrollment of participants                              |                                                                                            |
| Shengjie                          | Wu         |                       | MD               | The First Affiliated Hospital of Wenzhou Medical University                                        | Wenzhou, Zhejiang, China                 | Enrollment of participants                              |                                                                                            |
| Tingbo                            | Jiang      |                       | MD               | The First Affiliated Hospital of Soochow University                                                | Suzhou, Jiangsu, China                   | Enrollment of participants                              |                                                                                            |
| Yuzhen                            | Zhang      |                       | MD               | The First Affiliated Hospital of Soochow University                                                | Suzhou, Jiangsu, China                   | Enrollment of participants                              |                                                                                            |
| Mingsheng                         | Hu         |                       | MD               | The First Affiliated Hospital of Soochow University                                                | Suzhou, Jiangsu, China                   | Enrollment of participants                              |                                                                                            |
| Jie                               | Li         |                       | MD               | Air Force Military Medical University                                                              | Xian, Shanxi, China                      | Enrollment of participants                              |                                                                                            |
| Miaoyang                          | Hu         |                       | MD               | Air Force Military Medical University                                                              | Xian, Shanxi, China                      | Enrollment of participants                              |                                                                                            |
| Shijie                            | Li         |                       | MD               | Xuzhou Central Hospital, the Affiliated Xuzhou Hospital of Medical College of Southeast University | Xuzhou, Jiangsu, China                   | Enrollment of participants                              |                                                                                            |
| Weidong                           | Li         |                       | MD               | Xuzhou Central Hospital, the Affiliated Xuzhou Hospital of Medical College of Southeast University | Xuzhou, Jiangsu, China                   | Enrollment of participants                              |                                                                                            |
| Xianjin                           | Li         |                       | MD               | Xuzhou Central Hospital, the Affiliated Xuzhou Hospital of Medical College of Southeast University | Xuzhou, Jiangsu, China                   | Enrollment of participants                              |                                                                                            |

## Supplemental Online Content: Nonauthor Collaborators

\*Indicates required information. Only first name, last name, and suffix will appear in PubMed.

| *First Name and Middle Initial(s) | *Last Name | *Suffix (eg, Jr, III) | Academic Degrees | Institution                                                                           | Location (city, state/province, country) | Role or Contribution, eg, chair, principal investigator | Group (if more than 1 Group listed in the byline) and/or Subgroup (eg, Steering Committee) |
|-----------------------------------|------------|-----------------------|------------------|---------------------------------------------------------------------------------------|------------------------------------------|---------------------------------------------------------|--------------------------------------------------------------------------------------------|
| Ling                              | Yang       |                       | MD               | The Third Affiliated Hospital of Soochow University                                   | Changzhou, Jiangsu, China                | Enrollment of participants                              |                                                                                            |
| Lishang                           | Zhai       |                       | MD               | The Third Affiliated Hospital of Soochow University                                   | Changzhou, Jiangsu, China                | Enrollment of participants                              |                                                                                            |
| Xiaoqing                          | Wang       |                       | MD               | The Third Affiliated Hospital of Soochow University                                   | Changzhou, Jiangsu, China                | Enrollment of participants                              |                                                                                            |
| Qiang                             | Liu        |                       | MD               | Sir Run Run Shaw Hospital, affiliated with the Zhejiang University School of Medicine | Changzhou, Jiangsu, China                | Enrollment of participants                              |                                                                                            |
| Lu                                | Yu         |                       | MD               | Sir Run Run Shaw Hospital, affiliated with the Zhejiang University School of Medicine | Hangzhou, Zhejiang, China                | Enrollment of participants                              |                                                                                            |
| Ruhong                            | Jiang      |                       | MD               | Sir Run Run Shaw Hospital, affiliated with the Zhejiang University School of Medicine | Hangzhou, Zhejiang, China                | Enrollment of participants                              |                                                                                            |
| Shiquan                           | Chen       |                       | MD               | Sir Run Run Shaw Hospital, affiliated with the Zhejiang University School of Medicine | Hangzhou, Zhejiang, China                | Enrollment of participants                              |                                                                                            |
| Shaobo                            | Fan        |                       | MD               | Tianjin Chest Hospital                                                                | Tianjin, China                           | Enrollment of participants                              |                                                                                            |
| Fan                               | Zhang      |                       | MD               | Tianjin Chest Hospital                                                                | Tianjin, China                           | Enrollment of participants                              |                                                                                            |
| Jianyong                          | Li         |                       | MD               | The First Affiliated Hospital of Southern Medical University                          | Guangzhou, Guangdong, China              | Enrollment of participants                              |                                                                                            |
| Xinzhong                          | Li         |                       | MD               | The First Affiliated Hospital of Southern Medical University                          | Guangzhou, Guangdong, China              | Enrollment of participants                              |                                                                                            |
| Yaowu                             | Liu        |                       | MD               | Zhongda Hospital, Southeast University                                                | Nanjing, Jiangsu, China                  | Enrollment of participants                              |                                                                                            |
| Genshan                           | Ma         |                       | MD               | Zhongda Hospital, Southeast University                                                | Nanjing, Jiangsu, China                  | Enrollment of participants                              |                                                                                            |

## Supplemental Online Content: Nonauthor Collaborators

\*Indicates required information. Only first name, last name, and suffix will appear in PubMed.

| *First Name and Middle Initial(s) | *Last Name | *Suffix (eg, Jr, III) | Academic Degrees | Institution                                                 | Location (city, state/province, country) | Role or Contribution, eg, chair, principal investigator | Group (if more than 1 Group listed in the byline) and/or Subgroup (eg, Steering Committee) |
|-----------------------------------|------------|-----------------------|------------------|-------------------------------------------------------------|------------------------------------------|---------------------------------------------------------|--------------------------------------------------------------------------------------------|
| Mingfang                          | Li         |                       | MD               | The First Affiliated Hospital of Nanjing Medical University | Nanjing, Jiangsu, China                  | Manuscript drafting, tables and figures preparing       |                                                                                            |
| Youmei                            | Shen       |                       | MD               | The First Affiliated Hospital of Nanjing Medical University | Nanjing, Jiangsu, China                  | Manuscript drafting, tables and figures preparing       |                                                                                            |
| Chang                             | Cui        |                       | MD               | The First Affiliated Hospital of Nanjing Medical University | Nanjing, Jiangsu, China                  | Manuscript drafting, tables and figures preparing       |                                                                                            |
| Hailei                            | Liu        |                       | MD               | The First Affiliated Hospital of Nanjing Medical University | Nanjing, Jiangsu, China                  | Manuscript drafting, tables and figures preparing       |                                                                                            |
| Cheng                             | Cai        |                       | MD               | The First Affiliated Hospital of Nanjing Medical University | Nanjing, Jiangsu, China                  | Manuscript drafting, tables and figures preparing       |                                                                                            |
| Xiaohong                          | Jiang      |                       | MD               | The First Affiliated Hospital of Nanjing Medical University | Nanjing, Jiangsu, China                  | Manuscript drafting, tables and figures preparing       |                                                                                            |
| Nan                               | Wu         |                       | MD               | The First Affiliated Hospital of Nanjing Medical University | Nanjing, Jiangsu, China                  | Manuscript drafting, tables and figures preparing       |                                                                                            |
| Xingxing                          | Sun        |                       | MD               | The First Affiliated Hospital of Nanjing Medical University | Nanjing, Jiangsu, China                  | Manuscript drafting, tables and figures preparing       |                                                                                            |

## Supplemental Online Content: Nonauthor Collaborators

\*Indicates required information. Only first name, last name, and suffix will appear in PubMed.

| *First Name and Middle Initial(s) | *Last Name | *Suffix (eg, Jr, III) | Academic Degrees | Institution                                                 | Location (city, state/province, country) | Role or Contribution, eg, chair, principal investigator | Group (if more than 1 Group listed in the byline) and/or Subgroup (eg, Steering Committee) |
|-----------------------------------|------------|-----------------------|------------------|-------------------------------------------------------------|------------------------------------------|---------------------------------------------------------|--------------------------------------------------------------------------------------------|
| Qing                              | Yan        |                       | MD               | The First Affiliated Hospital of Nanjing Medical University | Nanjing, Jiangsu, China                  | Manuscript drafting, tables and figures preparing       |                                                                                            |
| Kexin                             | Wang       |                       | MD               | The First Affiliated Hospital of Nanjing Medical University | Nanjing, Jiangsu, China                  | Manuscript drafting, tables and figures preparing       |                                                                                            |
| Wenxi                             | Wu         |                       | MD               | The First Affiliated Hospital of Nanjing Medical University | Nanjing, Jiangsu, China                  | DSMB                                                    | Data safety monitoring board                                                               |
| Fumin                             | Zhang      |                       | MD               | The First Affiliated Hospital of Nanjing Medical University | Nanjing, Jiangsu, China                  | DSMB                                                    | Data safety monitoring board                                                               |
| Xin                               | Yao        |                       | MD               | The First Affiliated Hospital of Nanjing Medical University | Nanjing, Jiangsu, China                  | DSMB                                                    | Data safety monitoring board                                                               |
| Hao                               | Yu         |                       | MD               | Nanjing Medical University                                  | Nanjing, Jiangsu, China                  | DSMB                                                    | Data safety monitoring board                                                               |
| Xiuqing                           | Wang       |                       | MD               | The First Affiliated Hospital of Nanjing Medical University | Nanjing, Jiangsu, China                  | DSMB                                                    | Data safety monitoring board                                                               |
| Zhibin                            | Lu         |                       | MD               | Zhongnan Hospital of Wuhan University                       | Wuhan, Hubei, China                      | ERC                                                     | Event review committee                                                                     |
| Lichun                            | Wang       |                       | MD               | The First Affiliated Hospital of Sun Yat-Sen University     | Guangzhou, Guangdong, China              | ERC                                                     | Event review committee                                                                     |
| Jiang                             | Cao        |                       | MD               | Changhai Hospital, Naval Medical University                 | Shanghai, China                          | ERC                                                     | Event review committee                                                                     |
