# Supplementary material
Source: PubMed Central journal article supplement (PMC10308299)
Supplement: jamacardiol-e231749-s004.pdf [file jamacardiol-e231749-s004.pdf]

## Data Sharing Statement

Chen. Circumferential Pulmonary Vein Isolation With vs Without Additional Low-Voltage-Area Ablation in Older Patients With Paroxysmal Atrial Fibrillation. *JAMA Cardiol.* Published June 28, 2023. doi:10.1001/jamacardio.2023.1749

### Data

**Data available:** No

### Additional Information

**Explanation for why data not available:** Explanation for why data not available: The data can not be shared now. We plan to combine the data from this study with the data from our previous STABLE-SR-I and STABLE-SR-II trials to analyze the treatment effects in subgroups.
